# Supplementary material
Source: Research Square preprint supplement (doi:10.21203/rs.3.rs-9837782/v1)
Supplement: Supplementary file 1 [file 3bb93cf90809abedbe781633.doc]

**Supplementary materials**

**Table S1** List of Primers for Real-time Fluorescence Quantitative PCR.

**Table S2** Summary of Pathways related to plerocercoid Regeneration.

**Table S3** Primer Design of the main genes of the MAPK pathway.

**Table S4** List of primers for expressing pattern analysis.

**Table S5** Summary of Primer Sequences.

**Table S6** Detailed information on genes enriched in the MAPK signalling pathway.

**Table S7** Summary of sequence Characteristics of superoxide dismutase in *S. mansoni*.

**Table S8** Summary of superoxide dismutases (SODs) from medical cestodes and trematode.

**Figure S1** Diagrammatic sketch of GLP and BP of a plerocercoid.

**Figure S2** Analysis of chromosome positioning among species.

**Figure S3** Enrichment analysis of the 20 most significant KEGG pathways of DEGs in the germinal layer tissue of pterygoids. Different colours indicate different degrees of enrichment.

**Figure S4** Enrichment analysis of the 20 most significant KEGG pathways of DEGs in the body parts of plerocercoids.

**Figure S5** PPI analysis of differentially expressed genes. The dots represent differentially expressed genes.

**Table S1** List of Primers for Real-time Fluorescence Quantitative PCR.

| **Groups** | **Gene description** | **Unigene ID** | **Primer Sequence** | **Size (bp)** |
| --- | --- | --- | --- | --- |
| Down-regulated expression | Glycine, serine and threonine metabolism | SERJ2_LOCUS2199 | F 5'-GGGCTAGAATCCTTTCCT-3' | 167 |
| R 5'-ATCAGTTGCGACAGTTACAT-3' |
| Peroxiredoxin-2 | SERJ2_LOCUS18186 | F 5'-GCTCCACCGACTCCGAATA-3' | 180 |
| R 5'-TGCCGTCAATGATGAACAAA-3' |
| L-lactate dehydrogenase A chain | SERJ2_LOCUS23747 | F 5'-GAAGGGCTACACCTCTTGG-3' | 152 |
| R 5'-TTACGCAGGGCATACTGA-3' |
| Papain family cysteine protease | SERJ2_LOCUS9514 | F 5'- TGACGCCTCGTGAGTTTG-3' | 171 |
| R 5'-CTCCGCATTGACCCTGAT-3' |
| Receptor-type tyrosine-protein phosphatase | SERJ2_LOCUS2382 | F 5'-GCTCTTTCTTCATCCTCCAT-3' | 119 |
| R 5'-CGTAGGTACAAGTTACCCTCAT-3' |
| Up-regulated expression | Purine nucleoside phosphorylase | SERJ2_LOCUS19894 | F 5'-GGAGTAAACCCTGCCTTCA-3' | 127 |
| R 5'-GCTCATAATCGGTCCCAAA-3' |
| β-1,4-galactosyltransferase 2 | SERJ2_LOCUS20137 | F 5'-ACATCTCGCCCTCTACTGA-3' | 160 |
| R 5'-GCTTTCTGGGTGGTTTCG-3' |
| Chymotrypsin-like elastase family member 2A, Trypsin | SERJ2_LOCUS16043 | F 5'-AAGCCCATCGTCAAATCG-3' | 199 |
| R 5'-GAGCAACATCGTAACCACC-3' |
| Major intrinsic protein | SERJ2_LOCUS26383 | F 5'-GAGCAAGCCTGAATCCCT-3' | 198 |
| R 5'-CTTCGTTTCGGTTAAAGTCC-3' |
| Cysteine-rich secretory protein family | SERJ2_LOCUS22597 | F 5'-GCTCCCTCAGCCCTACAT-3' | 140 |
| R 5'-ACTGCCTCACCCACTCCTC-3' |
| Reference gene | glyceraldehyde-3-phosphate dehydrogenase | AB031067 | F 5'-AGCAACCTCGTTGATGTCGT-3' | 97 |
| R 5'-TGAATTGACCGTGGGTGGAG-3' |

Table S2 Summary of Pathways related to plerocercoid Regeneration.

| **No.** | **Pathway name** | **Pathway_ID** | **Reference** | **Species** |
| --- | --- | --- | --- | --- |
| 1 | Notch signaling pathway | map04330 | Zheng et al., 2015 | *Drosophila* |
| 2 | Hippo signaling pathway - fly | map04391 | Tian et al, 2015 | *Mus musculus* |
| 3 | Hippo signaling pathway | map04390 | Tian et al, 2015 | *Mus musculus* |
| 4 | PI3K-Akt signaling pathway | map04151 | Byrne et al., 2014 | *Caenorhabditis elegans* |
| 5 | JAK-STAT signaling pathway | map04630 | Zhou et al., 2022 | *Harmonia axyridis* |
| 6 | MAPK signaling pathway | map04010 | Hammarlund et al., 2009 | *C. elegans* |
| 7 | MAPK signaling pathway - fly | map04013 | Hammarlund et al., 2009 | *C. elegans* |
| 8 | Wnt signaling pathway | map04310 | Petersen et al., 2009 | the deuterostomes, the protostomes, and pre-bilaterians |
| 9 | AMPK signaling pathway | map04152 | Saharan et al., 2013 | *Homo sapiens* |
| 10 | PPAR signaling pathway | map03320 | Magadum et al., 2018 | *Homo sapiens* |
| 11 | FoxO signaling pathway | map04068 | Saharan et al., 2013 | *Homo sapiens* |
| 12 | mTOR signaling pathway | map04150 | Park et al., 2008 | *Homo sapiens* |
| 13 | VEGF signaling pathway | map04370 | Petersen et al., 2008 | *Turbellaria* |
| 14 | Neurotrophin signaling pathway | map04722 | Steketee et al., 2012 | *Homo sapiens* |
| 15 | Ras signaling pathway | map04014 | Missinato et al., 2018; Xu et al., 2021 | *Zebrafish* |

**Table S3** Primer Design of the main genes of the MAPK pathway.

| **Pathway** | **Gene Name** | **Pimer (5' - 3')** |
| --- | --- | --- |
| MAPK | E3 ubiquitin-protein ligase sina | GGATGCCAGTCAGATGGA |
| CGACAAGTGGGACAGGAG |
| Superoxide dismutase | TCGGGTCGTCAGCGTTAG |
| TGCTCCTCGGCAACATTC |
| Dual specificity mitogen-activated protein kinase 4 | TCAAACCCTCCAACATCC |
| AGTCCTAGCGACCAGACG |
| Receptor tyrosine-protein kinase erbB-3 | TGTAACTGGTGCTTCCTT |
| ACACGTATTGCCATCTTT |
| Proto-oncogene tyrosine-protein kinase Yrk | AATGGTGGCACAGTACAAA |
| CGTTGAGACCGAGTGTTT |
| Growth factor receptor-bound protein 2 | ATCCGCAGCCGTCCAAGA |
| TGCCACCAGTTCTCATCCTCAC |

**Table S4 List of primers for expressing pattern analysis.**

| **Primer Name** | **Primer Sequence (5' - 3')** | **Product length** |
| --- | --- | --- |
| GAPDH-F  GAPDH-R | AGCAACCTCGTTGATGTCGT  TGAATTGACCGTGGGTGGAG | 97 |
| *Sm*SOD1-F  *Sm*SOD1-R | CCCCACCAAATGCAACCA  CAACAAGGCACCGTCCAA | 161 |
| *Sm*SOD2-F  *Sm*SOD2-R | AAAGGTGGGCACGAACTG  GCTCCAAGGGTCCTAACG | 149 |
| *Sm*SOD5-F  *Sm*SOD5-R | GGGGTACTTGAGGACAGGA  TGAGGCAGCCAACCACTT | 124 |

Table S5 Summary of Primer Sequences.

| **Primer Name** | **Primer Sequence (5' - 3')** |
| --- | --- |
| Q*Sm*SOD2-F | AAAGGTGGGCACGAACTG |
| Q*Sm*SOD2-R | GCTCCAAGGGTCCTAACG |
| QGAPDH-F | AGCAACCTCGTTGATGTCGT |
| QGAPDH-R | TGAATTGACCGTGGGTGGAG |
| GAPDH-F | ATGTTGCCGTCAATGACCCCTTTAT |
| GAPDH-R | TCGCGCGGCTAGAAGTATTTTTTAG |

**Table S6 Detailed information on genes enriched in the MAPK signalling pathway.**

| **Gene ID** | **Description** | **Regulate** |
| --- | --- | --- |
| SERJ2_LOCUS1904 | Tyrosine-protein kinase HTK16 | Up |
| SERJ2_LOCUS2348 | Homeobox protein prospero | UP |
| SERJ2_LOCUS11279 | T-box transcription factor TBX3 | UP |
| SERJ2_LOCUS20316 | Receptor tyrosine-protein kinase | Up |
| SERJ2_LOCUS1604 | Mitogen-activated protein kinase 3 | Up |
| SERJ2_LOCUS1801 | Tyrosine-protein kinase HCK | Up |
| SERJ2_LOCUS22818 | Mitogen-activated protein kinase kinase kinase 7 | Up |
| SERJ2_LOCUS2596 | unnamed protein product | Up |
| SERJ2_LOCUS2011 | Dual specificity mitogen-activated protein kinase kinase | Up |
| SERJ2_LOCUS1173 | Epidermal growth factor receptor | Down |
| SERJ2_LOCUS20317 | Tyrosine-protein kinase transforming protein | Down |

Table S7 Summary of sequence Characteristics of superoxide dismutase in *Spirometra mansoni*.

| Sequences | CDS (bp) | Protein (aa) | Mw (Da) | PI | Subcellular location |
| --- | --- | --- | --- | --- | --- |
| *Sm*SOD1 | 739 | 154 | 15835.61 | 6.17 | Cytoplasm |
| *Sm*SOD2 | 669 | 222 | 24686.14 | 8.93 | Mitochondrion |
| *Sm*SOD3 | 300 | 99 | 10106.81 | 8.91 | Cytoplasm |
| *Sm*SOD4 | 432 | 101 | 11048.87 | 8.35 | Cytomembrane |
| *Sm*SOD5 | 681 | 226 | 24190.60 | 6.86 | Cytoplasm |
| *Sm*SOD6 | 669 | 222 | 24700.17 | 8.93 | Mitochondrion |
| *Sm*SOD7 | 210 | 69 | 7330.09 | 4.70 | Cytoplasm, extracell |
| *Sm*SOD8 | 210 | 69 | 7186.01 | 5.46 | Cytoplasm, extracell |
| *Sm*SOD9 | 558 | 185 | 20511.45 | 9.32 | Mitochondrion |
| *Sm*SOD10 | 384 | 127 | 13497.21 | 6.69 | Cytoplasm |

Table S8 Summary of superoxide dismutases (SODs) from medical cestodes and trematodes.

| **Class** | **Family** | **Genus** | **SPECIES** | **Number** | **SEQUENCE ID** |
| --- | --- | --- | --- | --- | --- |
| Cestoda | Diphyllobothriidea | *Dibothriocephalus* | *D. latus* | 3 | DILT_0001277901,DILT_0001725901,[DILT_0000889401](https://parasite.wormbase.org/Dibothriocephalus_latus_prjeb1206/Gene/Summary?g=DILT_0000889401;r=DILT_scaffold0013456:6214-7230) |
| *Spirometra* | *S. mansoni* | 10 | AY396149.1,SERJ2_LOCUS18812,SERJ2_LOCUS20580,SERJ2_LOCUS26088,SERJ2_LOCUS4312,SPER_0003506001,SPER_0001139601,SPER_0000643301,SPER_0001045701,SPER_0002888101 |
| *Schistocephalus* | *S. solidus* | 5 | [SSLN_0000304301](https://parasite.wormbase.org/Schistocephalus_solidus_prjeb527/Gene/Summary?g=SSLN_0000304301;r=SSLN_scaffold0000218:3266-5572),[SSLN_0001685701](https://parasite.wormbase.org/Schistocephalus_solidus_prjeb527/Gene/Summary?g=SSLN_0001685701;r=SSLN_scaffold0008690:2606-3727),[SSLN_0001577401](https://parasite.wormbase.org/Schistocephalus_solidus_prjeb527/Gene/Summary?g=SSLN_0001577401;r=SSLN_scaffold0007525:7650-10748),[SSLN_0000664501](https://parasite.wormbase.org/Schistocephalus_solidus_prjeb527/Gene/Summary?g=SSLN_0000664501;r=SSLN_scaffold0001527:10154-14600),[SSLN_0000664601](https://parasite.wormbase.org/Schistocephalus_solidus_prjeb527/Gene/Summary?g=SSLN_0000664601;r=SSLN_scaffold0001527:27153-44573) |
| Taeniidae | *Echinococcus* | *E. canadensis* | 2 | [EcG7_07533](https://parasite.wormbase.org/Echinococcus_canadensis_prjeb8992/Gene/Summary?g=EcG7_07533;r=E.canG7_contigs_7935:7936-9129),[EcG7_00955](https://parasite.wormbase.org/Echinococcus_canadensis_prjeb8992/Gene/Summary?g=EcG7_00955;r=E.canG7_contigs_3230:245745-248152) |
| *E. granulosus* | 6 | [EgrG_000607900](https://parasite.wormbase.org/Echinococcus_granulosus_prjeb121/Gene/Summary?g=EgrG_000607900;r=pathogen_EgG_scaffold_0003:3711099-3712295),[EgrG_000638300](https://parasite.wormbase.org/Echinococcus_granulosus_prjeb121/Gene/Summary?g=EgrG_000638300;r=pathogen_EgG_scaffold_0003:6583375-6585739);[EGR_10137](https://parasite.wormbase.org/Echinococcus_granulosus_prjna182977/Gene/Summary?g=EGR_10137;r=EG_S00193:7133-8329),[EGR_01933](https://parasite.wormbase.org/Echinococcus_granulosus_prjna182977/Gene/Summary?g=EGR_01933;r=EG_S00008:280008-282830);[ECG_05401](https://parasite.wormbase.org/Echinococcus_granulosus_prjna754835/Gene/Summary?g=ECG_05401;r=4:4348343-4349539),[ECG_05673](https://parasite.wormbase.org/Echinococcus_granulosus_prjna754835/Gene/Summary?g=ECG_05673;r=4:7357522-7359886) |
| 1. *oligarthrus* | 1 | [Eoli_000638300](https://parasite.wormbase.org/Echinococcus_oligarthrus_prjeb31222/Gene/Summary?g=Eoli_000638300;r=pathogen_Eoli_scaffold_05:5098475-5098753) |
| *E. multilocularis* | 2 | [EmuJ_000607900](https://parasite.wormbase.org/Echinococcus_multilocularis_prjeb122/Gene/Summary?g=EmuJ_000607900;r=pathogen_EmW_scaffold_05:4245203-4246397),[EmuJ_000638300](https://parasite.wormbase.org/Echinococcus_multilocularis_prjeb122/Gene/Summary?g=EmuJ_000638300;r=pathogen_EmW_scaffold_05:7148013-7150367) |
| *Taenia* | *T. asiatica* | 4 | [TASK_0000077601](https://parasite.wormbase.org/Taenia_asiatica_prjeb532/Gene/Summary?g=TASK_0000077601;r=TASK_contig0000120:7381-8556),[TASK_0000858201](https://parasite.wormbase.org/Taenia_asiatica_prjeb532/Gene/Summary?g=TASK_0000858201;r=TASK_scaffold0000543:21862-24011);[TASs00045g05217](https://parasite.wormbase.org/Taenia_asiatica_prjna299871/Gene/Summary?g=TASs00045g05217;r=Scaffold00045:52776-54248),[TASs00033g04474](https://parasite.wormbase.org/Taenia_asiatica_prjna299871/Gene/Summary?g=TASs00033g04474;r=Scaffold00033:345658-347963) |
| *T. multiceps* | 2 | [Tm3G009003](https://parasite.wormbase.org/Taenia_multiceps_prjna307624/Gene/Summary?g=Tm3G009003;r=LG3:20008317-20009490),[Tm3G008690](https://parasite.wormbase.org/Taenia_multiceps_prjna307624/Gene/Summary?g=Tm3G008690;r=LG3:15896283-15898432) |
| *T. saginata* | 2 | [TSAs00017g03441](https://parasite.wormbase.org/Taenia_saginata_prjna71493/Gene/Summary?g=TSAs00017g03441;r=Scaffold00017:1119101-1121406),[TSAs00028g04548](https://parasite.wormbase.org/Taenia_saginata_prjna71493/Gene/Summary?g=TSAs00028g04548;r=Scaffold00028:551740-553106) |
| *T. solium* | 2 | [TsM_000891800](https://parasite.wormbase.org/Taenia_solium_prjna170813/Gene/Summary?g=TsM_000891800;r=pathogen_TSM_contig_01124:1996-4188),[TsM_000528400](https://parasite.wormbase.org/Taenia_solium_prjna170813/Gene/Summary?g=TsM_000528400;r=pathogen_TSM_contig_01223:7690-8862) |
| *Hydatigera* | *H. taeniaeformis* | 2 | [TTAC_0000614801](https://parasite.wormbase.org/Hydatigera_taeniaeformis_prjeb534/Gene/Summary?g=TTAC_0000614801;r=TTAC_scaffold0000002:157192-158239),[TTAC_0000669601](https://parasite.wormbase.org/Hydatigera_taeniaeformis_prjeb534/Gene/Summary?g=TTAC_0000669601;r=TTAC_scaffold0000023:96246-98338) |
| Hymenolepididae | *Hymenolepis* | *H. diminuta* | 4 | [WMSIL1_LOCUS3451](https://parasite.wormbase.org/Hymenolepis_diminuta_prjeb30942/Gene/Summary?g=WMSIL1_LOCUS3451;r=scaffold19_2469730_f17Z2469730:2304450-2305394),[WMSIL1_LOCUS3620](https://parasite.wormbase.org/Hymenolepis_diminuta_prjeb30942/Gene/Summary?g=WMSIL1_LOCUS3620;r=scaffold1_6937183_f1Z6937183:821312-823983);[HDID_0000817001](https://parasite.wormbase.org/Hymenolepis_diminuta_prjeb507/Gene/Summary?g=HDID_0000817001;r=HDID_scaffold0000163:92578-93384),[HDID_0000593801](https://parasite.wormbase.org/Hymenolepis_diminuta_prjeb507/Gene/Summary?g=HDID_0000593801;r=HDID_contig0003775:516-3013) |
| *H. nana* | 2 | [HNAJ_0001200201](https://parasite.wormbase.org/Hymenolepis_nana_prjeb508/Gene/Summary?g=HNAJ_0001200201;r=HNAJ_scaffold0001939:15294-16073),[HNAJ_0000779901](https://parasite.wormbase.org/Hymenolepis_nana_prjeb508/Gene/Summary?g=HNAJ_0000779901;r=HNAJ_scaffold0000120:12001-14677) |
| *H. microstoma* | 2 | [HmN_000012300](https://parasite.wormbase.org/Hymenolepis_microstoma_prjeb124/Gene/Summary?g=HmN_000012300;r=HMN_05_pilon:20804520-20805299),[HmN_000348400](https://parasite.wormbase.org/Hymenolepis_microstoma_prjeb124/Gene/Summary?g=HmN_000348400;r=HMN_05_pilon:14470591-14473061) |
| Mesocestoididae | *Mesocestoides* | *M. corti* | 2 | [MCU_000816](https://parasite.wormbase.org/Mesocestoides_corti_prjeb510/Gene/Summary?g=MCU_000816;r=MCOS_scaffold0000030:5823-8583),[MCU_005729](https://parasite.wormbase.org/Mesocestoides_corti_prjeb510/Gene/Summary?g=MCU_005729;r=MCOS_scaffold0000315:62699-64533) |
| Trematoda | Schistosomatidae | *Schistosoma* | *S. japonicum* | 12 | [Sjp_0077340](https://parasite.wormbase.org/Schistosoma_japonicum_prjea34885/Gene/Summary?g=Sjp_0077340;r=SJC_S001302:131233-134543),[Sjp_0042990](https://parasite.wormbase.org/Schistosoma_japonicum_prjea34885/Gene/Summary?g=Sjp_0042990;r=SJC_S000347:85838-88732),[Sjp_0042980](https://parasite.wormbase.org/Schistosoma_japonicum_prjea34885/Gene/Summary?g=Sjp_0042980;r=SJC_S000347:80647-82209),[Sjp_0014620](https://parasite.wormbase.org/Schistosoma_japonicum_prjea34885/Gene/Summary?g=Sjp_0014620;r=SJC_S000064:439030-443392);[EWB00_008011](https://parasite.wormbase.org/Schistosoma_japonicum_prjna520774/Gene/Summary?g=EWB00_008011;r=scaffold_442:473728-477577),[EWB00_006584](https://parasite.wormbase.org/Schistosoma_japonicum_prjna520774/Gene/Summary?g=EWB00_006584;r=scaffold_40:1164637-1169361),[EWB00_006585](https://parasite.wormbase.org/Schistosoma_japonicum_prjna520774/Gene/Summary?g=EWB00_006585;r=scaffold_40:1172918-1179883),[EWB00_007188](https://parasite.wormbase.org/Schistosoma_japonicum_prjna520774/Gene/Summary?g=EWB00_007188;r=scaffold_412:12753-19988);[GWHGBJUN009593](https://parasite.wormbase.org/Schistosoma_japonicum_prjna724792/Gene/Summary?g=GWHGBJUN009593;r=Z:82906735-82910649),[GWHGBJUN003851](https://parasite.wormbase.org/Schistosoma_japonicum_prjna724792/Gene/Summary?g=GWHGBJUN003851;r=3:15190002-15197105),[GWHGBJUN009474](https://parasite.wormbase.org/Schistosoma_japonicum_prjna724792/Gene/Summary?g=GWHGBJUN009474;r=Z:78311958-78319178),[GWHGBJUN003850](https://parasite.wormbase.org/Schistosoma_japonicum_prjna724792/Gene/Summary?g=GWHGBJUN003850;r=3:15185692-15186442) |
|  |  |  | 1. *haematobium* | 12 | [MS3_00005185](https://parasite.wormbase.org/Schistosoma_haematobium_prjna78265/Gene/Summary?g=MS3_00005185;r=3:18914541-18918655),[MS3_00002625](https://parasite.wormbase.org/Schistosoma_haematobium_prjna78265/Gene/Summary?g=MS3_00002625;r=ZW:4465289-4468582),[MS3_00002723](https://parasite.wormbase.org/Schistosoma_haematobium_prjna78265/Gene/Summary?g=MS3_00002723;r=ZW:9095712-9112230),[MS3_00010594](https://parasite.wormbase.org/Schistosoma_haematobium_prjna78265/Gene/Summary?g=MS3_00010594;r=3:18925919-18930365);[SHAE1_63300](https://parasite.wormbase.org/Schistosoma_haematobium_td1prjeb44434/Gene/Summary?g=SHAE1_63300;r=CHR_3:19081974-19086566),[SHAE1_63290](https://parasite.wormbase.org/Schistosoma_haematobium_td1prjeb44434/Gene/Summary?g=SHAE1_63290;r=CHR_3:19068812-19073835),[SHAE1_1350](https://parasite.wormbase.org/Schistosoma_haematobium_td1prjeb44434/Gene/Summary?g=SHAE1_1350;r=CHR_Z:4599612-4602876),[SHAE1_2390](https://parasite.wormbase.org/Schistosoma_haematobium_td1prjeb44434/Gene/Summary?g=SHAE1_2390;r=CHR_Z:9201326-9215380);[SHAE2_65770](https://parasite.wormbase.org/Schistosoma_haematobium_td2prjeb44434/Gene/Summary?g=SHAE2_65770;r=CHR_3:19628729-19631737),[SHAE2_2490](https://parasite.wormbase.org/Schistosoma_haematobium_td2prjeb44434/Gene/Summary?g=SHAE2_2490;r=CHR_Z:9705025-9716727),[SHAE2_65780](https://parasite.wormbase.org/Schistosoma_haematobium_td2prjeb44434/Gene/Summary?g=SHAE2_65780;r=CHR_3:19639876-19644468),[SHAE2_1450](https://parasite.wormbase.org/Schistosoma_haematobium_td2prjeb44434/Gene/Summary?g=SHAE2_1450;r=CHR_Z:4995677-4998941) |
| *S. mansoni* | 4 | [Smp_056440](https://parasite.wormbase.org/Schistosoma_mansoni_prjea36577/Gene/Summary?g=Smp_056440;r=SM_V10_Z:4296363-4300424),[Smp_174810](https://parasite.wormbase.org/Schistosoma_mansoni_prjea36577/Gene/Summary?g=Smp_174810;r=SM_V10_3:20557518-20562418),[Smp_176200](https://parasite.wormbase.org/Schistosoma_mansoni_prjea36577/Gene/Summary?g=Smp_176200;r=SM_V10_Z:9193382-9202424),[Smp_095980](https://parasite.wormbase.org/Schistosoma_mansoni_prjea36577/Gene/Summary?g=Smp_095980;r=SM_V10_3:20571765-20576938) |
| *S.margrebowiei* | 4 | [SMRG1_780](https://parasite.wormbase.org/Schistosoma_margrebowiei_prjeb44434/Gene/Summary?g=SMRG1_780;r=CHR_Z:2981395-2984955),[SMRG1_62250](https://parasite.wormbase.org/Schistosoma_margrebowiei_prjeb44434/Gene/Summary?g=SMRG1_62250;r=CHR_3:18794469-18800147),[SMRG1_62240](https://parasite.wormbase.org/Schistosoma_margrebowiei_prjeb44434/Gene/Summary?g=SMRG1_62240;r=CHR_3:18781818-18785506),[SMRG1_1960](https://parasite.wormbase.org/Schistosoma_margrebowiei_prjeb44434/Gene/Summary?g=SMRG1_1960;r=CHR_Z:6797966-6804143) |
| *S. mattheei* | 4 | [SMTH1_1340](https://parasite.wormbase.org/Schistosoma_mattheei_prjeb44434/Gene/Summary?g=SMTH1_1340;r=CHR_Z:3973801-3977438),[SMTH1_68570](https://parasite.wormbase.org/Schistosoma_mattheei_prjeb44434/Gene/Summary?g=SMTH1_68570;r=CHR_3:19422689-19433548),[SMTH1_2610](https://parasite.wormbase.org/Schistosoma_mattheei_prjeb44434/Gene/Summary?g=SMTH1_2610;r=CHR_Z:8535141-8544741),[SMTH1_68580](https://parasite.wormbase.org/Schistosoma_mattheei_prjeb44434/Gene/Summary?g=SMTH1_68580;r=CHR_3:19435594-19441320) |
| *S. rodhaini* | 8 | [SRDH1_1120](https://parasite.wormbase.org/Schistosoma_rodhaini_td1prjeb44434/Gene/Summary?g=SRDH1_1120;r=CHR_Z:4365645-4375598),[SRDH1_65120](https://parasite.wormbase.org/Schistosoma_rodhaini_td1prjeb44434/Gene/Summary?g=SRDH1_65120;r=CHR_3:28404897-28410249),[SRDH1_65130](https://parasite.wormbase.org/Schistosoma_rodhaini_td1prjeb44434/Gene/Summary?g=SRDH1_65130;r=CHR_3:28420832-28425543),[SRDH1_2140](https://parasite.wormbase.org/Schistosoma_rodhaini_td1prjeb44434/Gene/Summary?g=SRDH1_2140;r=CHR_Z:9224690-9245156);[SRDH2_1180](https://parasite.wormbase.org/Schistosoma_rodhaini_td2prjeb44434/Gene/Summary?g=SRDH2_1180;r=CHR_Z:5275988-5285937),[SRDH2_63250](https://parasite.wormbase.org/Schistosoma_rodhaini_td2prjeb44434/Gene/Summary?g=SRDH2_63250;r=CHR_3:19713359-19719503),[SRDH2_63240](https://parasite.wormbase.org/Schistosoma_rodhaini_td2prjeb44434/Gene/Summary?g=SRDH2_63240;r=CHR_3:19699126-19703838),[SRDH2_2220](https://parasite.wormbase.org/Schistosoma_rodhaini_td2prjeb44434/Gene/Summary?g=SRDH2_2220;r=CHR_Z:10127989-10148458) |
| *S.bovis* | 12 | [DC041_0009528](https://parasite.wormbase.org/Schistosoma_bovis_prjna451066/Gene/Summary?g=DC041_0009528;r=SBOVIS_3327:148-423),[DC041_0006864](https://parasite.wormbase.org/Schistosoma_bovis_prjna451066/Gene/Summary?g=DC041_0006864;r=SBOVIS_1458:315601-317146),[DC041_0000454](https://parasite.wormbase.org/Schistosoma_bovis_prjna451066/Gene/Summary?g=DC041_0000454;r=SBOVIS_4594:2146-4689),[DC041_0006887](https://parasite.wormbase.org/Schistosoma_bovis_prjna451066/Gene/Summary?g=DC041_0006887;r=SBOVIS_1458:325797-333345);[SBOV1_60520](https://parasite.wormbase.org/Schistosoma_bovis_td1prjeb44434/Gene/Summary?g=SBOV1_60520;r=CHR_3:18095904-18098914),[SBOV1_60530](https://parasite.wormbase.org/Schistosoma_bovis_td1prjeb44434/Gene/Summary?g=SBOV1_60530;r=CHR_3:18107898-18113356),[SBOV1_2150](https://parasite.wormbase.org/Schistosoma_bovis_td1prjeb44434/Gene/Summary?g=SBOV1_2150;r=CHR_Z:9050452-9060756),[SBOV1_1160](https://parasite.wormbase.org/Schistosoma_bovis_td1prjeb44434/Gene/Summary?g=SBOV1_1160;r=CHR_Z:4331828-4335559);[SBOV2_61250](https://parasite.wormbase.org/Schistosoma_bovis_td2prjeb44434/Gene/Summary?g=SBOV2_61250;r=CHR_3:18965349-18969468),[SBOV2_61260](https://parasite.wormbase.org/Schistosoma_bovis_td2prjeb44434/Gene/Summary?g=SBOV2_61260;r=CHR_3:18977138-18982501),[SBOV2_1180](https://parasite.wormbase.org/Schistosoma_bovis_td2prjeb44434/Gene/Summary?g=SBOV2_1180;r=CHR_Z:4299902-4303648),[SBOV2_2200](https://parasite.wormbase.org/Schistosoma_bovis_td2prjeb44434/Gene/Summary?g=SBOV2_2200;r=CHR_Z:9093267-9099714) |
| *S. curassoni* | 8 | [SCUR1_1060](https://parasite.wormbase.org/Schistosoma_curassoni_prjeb44434/Gene/Summary?g=SCUR1_1060;r=CHR_Z:3926220-3929863),[SCUR1_61560](https://parasite.wormbase.org/Schistosoma_curassoni_prjeb44434/Gene/Summary?g=SCUR1_61560;r=CHR_3:17673927-17682268),[SCUR1_2020](https://parasite.wormbase.org/Schistosoma_curassoni_prjeb44434/Gene/Summary?g=SCUR1_2020;r=CHR_Z:8260999-8299368),[SCUR1_61570](https://parasite.wormbase.org/Schistosoma_curassoni_prjeb44434/Gene/Summary?g=SCUR1_61570;r=CHR_3:17690831-17696587);[SCUD_0000786801](https://parasite.wormbase.org/Schistosoma_curassoni_prjeb519/Gene/Summary?g=SCUD_0000786801;r=SCUD_scaffold0000294:42523-45832),[SCUD_0000988501](https://parasite.wormbase.org/Schistosoma_curassoni_prjeb519/Gene/Summary?g=SCUD_0000988501;r=SCUD_scaffold0001258:30166-30557),[SCUD_0000988401](https://parasite.wormbase.org/Schistosoma_curassoni_prjeb519/Gene/Summary?g=SCUD_0000988401;r=SCUD_scaffold0001258:19722-21488),[SCUD_0000524101](https://parasite.wormbase.org/Schistosoma_curassoni_prjeb519/Gene/Summary?g=SCUD_0000524101;r=SCUD_contig0008162:437-2708) |
| [*S. intercalatum*](https://parasite.wormbase.org/Schistosoma_intercalatum_td1prjeb44434) | 8 | [SINT1_61360](https://parasite.wormbase.org/Schistosoma_intercalatum_td1prjeb44434/Gene/Summary?g=SINT1_61360;r=CHR_3:17908130-17911138),[SINT1_1090](https://parasite.wormbase.org/Schistosoma_intercalatum_td1prjeb44434/Gene/Summary?g=SINT1_1090;r=CHR_Z:3963447-3967104),[SINT1_2070](https://parasite.wormbase.org/Schistosoma_intercalatum_td1prjeb44434/Gene/Summary?g=SINT1_2070;r=CHR_Z:8353388-8364385),[SINT1_61370](https://parasite.wormbase.org/Schistosoma_intercalatum_td1prjeb44434/Gene/Summary?g=SINT1_61370;r=CHR_3:17920480-17926002);[SINT2_60480](https://parasite.wormbase.org/Schistosoma_intercalatum_td2prjeb44434/Gene/Summary?g=SINT2_60480;r=CHR_3:17334052-17337060),[SINT2_1070](https://parasite.wormbase.org/Schistosoma_intercalatum_td2prjeb44434/Gene/Summary?g=SINT2_1070;r=CHR_Z:3855667-3859324),[SINT2_2170](https://parasite.wormbase.org/Schistosoma_intercalatum_td2prjeb44434/Gene/Summary?g=SINT2_2170;r=CHR_Z:8923979-8934977),[SINT2_60490](https://parasite.wormbase.org/Schistosoma_intercalatum_td2prjeb44434/Gene/Summary?g=SINT2_60490;r=CHR_3:17346402-17351924) |
| *S.* [*guineensis*](https://parasite.wormbase.org/Schistosoma_guineensis_prjeb44434) | 4 | [SGUI1_62080](https://parasite.wormbase.org/Schistosoma_guineensis_prjeb44434/Gene/Summary?g=SGUI1_62080;r=CHR_3:18683940-18686582),[SGUI1_1150](https://parasite.wormbase.org/Schistosoma_guineensis_prjeb44434/Gene/Summary?g=SGUI1_1150;r=CHR_Z:4146639-4150346),[SGUI1_2210](https://parasite.wormbase.org/Schistosoma_guineensis_prjeb44434/Gene/Summary?g=SGUI1_2210;r=CHR_Z:8586881-8593225),[SGUI1_62100](https://parasite.wormbase.org/Schistosoma_guineensis_prjeb44434/Gene/Summary?g=SGUI1_62100;r=CHR_3:18698433-18704421) |
|  |  |  | [*S. spindale*](https://parasite.wormbase.org/Schistosoma_spindale_prjeb44434) | 4 | [SSPN1_320](https://parasite.wormbase.org/Schistosoma_spindale_prjeb44434/Gene/Summary?g=SSPN1_320;r=CHR_Z:1336619-1340691),[SSPN1_62520](https://parasite.wormbase.org/Schistosoma_spindale_prjeb44434/Gene/Summary?g=SSPN1_62520;r=CHR_3:29429419-29432491),[SSPN1_2130](https://parasite.wormbase.org/Schistosoma_spindale_prjeb44434/Gene/Summary?g=SSPN1_2130;r=CHR_Z:8974744-8983637),[SSPN1_62510](https://parasite.wormbase.org/Schistosoma_spindale_prjeb44434/Gene/Summary?g=SSPN1_62510;r=CHR_3:29418374-29422352) |
| [*S. turkestanicum*](https://parasite.wormbase.org/Schistosoma_turkestanicum_prjeb44434) | 4 | [STRK1_60850](https://parasite.wormbase.org/Schistosoma_turkestanicum_prjeb44434/Gene/Summary?g=STRK1_60850;r=CHR_3:21234236-21244818),[STRK1_710](https://parasite.wormbase.org/Schistosoma_turkestanicum_prjeb44434/Gene/Summary?g=STRK1_710;r=CHR_Z:2007904-2017987),[STRK1_1470](https://parasite.wormbase.org/Schistosoma_turkestanicum_prjeb44434/Gene/Summary?g=STRK1_1470;r=CHR_Z:5523691-5527473),[STRK1_60860](https://parasite.wormbase.org/Schistosoma_turkestanicum_prjeb44434/Gene/Summary?g=STRK1_60860;r=CHR_3:21255050-21258482) |
| *Trichobilharzia* | 1. *regenti* | 8 | [TREG1_390](https://parasite.wormbase.org/Trichobilharzia_regenti_prjeb44434/Gene/Summary?g=TREG1_390;r=CHR_Z:1933792-1938153),[TREG1_11490](https://parasite.wormbase.org/Trichobilharzia_regenti_prjeb44434/Gene/Summary?g=TREG1_11490;r=CHR_Z:64075331-64077871),[TREG1_85900](https://parasite.wormbase.org/Trichobilharzia_regenti_prjeb44434/Gene/Summary?g=TREG1_85900;r=CHR_3:65016592-65030121),[TREG1_85910](https://parasite.wormbase.org/Trichobilharzia_regenti_prjeb44434/Gene/Summary?g=TREG1_85910;r=CHR_3:65116641-65126533),[TREG1_91610](https://parasite.wormbase.org/Trichobilharzia_regenti_prjeb44434/Gene/Summary?g=TREG1_91610;r=CHR_3:99370814-99372068),[TREG1_85880](https://parasite.wormbase.org/Trichobilharzia_regenti_prjeb44434/Gene/Summary?g=TREG1_85880;r=CHR_3:64960296-64966574),[TREG1_91620](https://parasite.wormbase.org/Trichobilharzia_regenti_prjeb44434/Gene/Summary?g=TREG1_91620;r=CHR_3:99393152-99395123),[TREG1_85890](https://parasite.wormbase.org/Trichobilharzia_regenti_prjeb44434/Gene/Summary?g=TREG1_85890;r=CHR_3:64979283-64986497) |
| 1. *szidati* | 7 | [TSZD1_89170](https://parasite.wormbase.org/Trichobilharzia_szidati_prjeb44434/Gene/Summary?g=TSZD1_89170;r=CHR_3:75881313-75980680),[TSZD1_4320](https://parasite.wormbase.org/Trichobilharzia_szidati_prjeb44434/Gene/Summary?g=TSZD1_4320;r=CHR_Z:34393489-34397537),[TSZD1_89340](https://parasite.wormbase.org/Trichobilharzia_szidati_prjeb44434/Gene/Summary?g=TSZD1_89340;r=CHR_3:77293256-77303369),[TSZD1_13030](https://parasite.wormbase.org/Trichobilharzia_szidati_prjeb44434/Gene/Summary?g=TSZD1_13030;r=CHR_Z:81599870-81603800),[TSZD1_13070](https://parasite.wormbase.org/Trichobilharzia_szidati_prjeb44434/Gene/Summary?g=TSZD1_13070;r=CHR_Z:81663301-81667478),[TSZD1_89180](https://parasite.wormbase.org/Trichobilharzia_szidati_prjeb44434/Gene/Summary?g=TSZD1_89180;r=CHR_3:76007887-76014117),[TSZD1_89190](https://parasite.wormbase.org/Trichobilharzia_szidati_prjeb44434/Gene/Summary?g=TSZD1_89190;r=CHR_3:76022406-76028779) |
| *Heterobilharzia* | [*H. americana*](https://parasite.wormbase.org/Heterobilharzia_americana_td1prjeb44434) | 8 | [HAMR1_660](https://parasite.wormbase.org/Heterobilharzia_americana_td1prjeb44434/Gene/Summary?g=HAMR1_660;r=CHR_Z:4053049-4061929),[HAMR1_6280](https://parasite.wormbase.org/Heterobilharzia_americana_td1prjeb44434/Gene/Summary?g=HAMR1_6280;r=CHR_Z:34564425-34575551),[HAMR1_79210](https://parasite.wormbase.org/Heterobilharzia_americana_td1prjeb44434/Gene/Summary?g=HAMR1_79210;r=CHR_3:48267765-48275495);[HAMR2_69780](https://parasite.wormbase.org/Heterobilharzia_americana_td2prjeb44434/Gene/Summary?g=HAMR2_69780;r=CHR_3:49305765-49309254),[HAMR2_69770](https://parasite.wormbase.org/Heterobilharzia_americana_td2prjeb44434/Gene/Summary?g=HAMR2_69770;r=CHR_3:49277979-49278248),[HAMR2_69790](https://parasite.wormbase.org/Heterobilharzia_americana_td2prjeb44434/Gene/Summary?g=HAMR2_69790;r=CHR_3:49330819-49336411),[HAMR2_69800](https://parasite.wormbase.org/Heterobilharzia_americana_td2prjeb44434/Gene/Summary?g=HAMR2_69800;r=CHR_3:49360238-49367774),[HAMR2_69750](https://parasite.wormbase.org/Heterobilharzia_americana_td2prjeb44434/Gene/Summary?g=HAMR2_69750;r=CHR_3:49232831-49264399) |
| Opisthorchiidae | *Clonorchis* | *C. sinensis* | 15 | [csin112807](https://parasite.wormbase.org/Clonorchis_sinensis_prjda72781/Gene/Summary?g=csin112807;r=scf01940:25669-31443),[csin110556](https://parasite.wormbase.org/Clonorchis_sinensis_prjda72781/Gene/Summary?g=csin110556;r=scf01043:70520-80081),[csin105946](https://parasite.wormbase.org/Clonorchis_sinensis_prjda72781/Gene/Summary?g=csin105946;r=scf00367:174247-181763),[csin105945](https://parasite.wormbase.org/Clonorchis_sinensis_prjda72781/Gene/Summary?g=csin105945;r=scf00367:134976-157245),[csin109998](https://parasite.wormbase.org/Clonorchis_sinensis_prjda72781/Gene/Summary?g=csin109998;r=scf00927:9658-13989),[csin105944](https://parasite.wormbase.org/Clonorchis_sinensis_prjda72781/Gene/Summary?g=csin105944;r=scf00367:108660-126076),[csin112034](https://parasite.wormbase.org/Clonorchis_sinensis_prjda72781/Gene/Summary?g=csin112034;r=scf01522:41270-48740);[CSKR_108764](https://parasite.wormbase.org/Clonorchis_sinensis_prjna386618/Gene/Summary?g=CSKR_108764;r=2:1243683-1249622),[CSKR_107151](https://parasite.wormbase.org/Clonorchis_sinensis_prjna386618/Gene/Summary?g=CSKR_107151;r=2:17671323-17681148),[CSKR_103903](https://parasite.wormbase.org/Clonorchis_sinensis_prjna386618/Gene/Summary?g=CSKR_103903;r=2:138439708-138450346),[CSKR_103902](https://parasite.wormbase.org/Clonorchis_sinensis_prjna386618/Gene/Summary?g=CSKR_103902;r=2:138468355-138473770),[CSKR_103901](https://parasite.wormbase.org/Clonorchis_sinensis_prjna386618/Gene/Summary?g=CSKR_103901;r=2:138488707-138491497),[CSKR_108723](https://parasite.wormbase.org/Clonorchis_sinensis_prjna386618/Gene/Summary?g=CSKR_108723;r=2:287619-296406),[CSKR_103900](https://parasite.wormbase.org/Clonorchis_sinensis_prjna386618/Gene/Summary?g=CSKR_103900;r=2:138507950-138518623),[CSKR_113356](https://parasite.wormbase.org/Clonorchis_sinensis_prjna386618/Gene/Summary?g=CSKR_113356;r=4:10976178-10978061) |
| 1. *felineus* | 8 | [CRM22_004528](https://parasite.wormbase.org/Opisthorchis_felineus_prjna413383/Gene/Summary?g=CRM22_004528;r=scaff_173:387986-393829),[CRM22_003488](https://parasite.wormbase.org/Opisthorchis_felineus_prjna413383/Gene/Summary?g=CRM22_003488;r=scaff_1629:10309-17404),[CRM22_004124](https://parasite.wormbase.org/Opisthorchis_felineus_prjna413383/Gene/Summary?g=CRM22_004124;r=scaff_1692:303781-306215),[CRM22_004125](https://parasite.wormbase.org/Opisthorchis_felineus_prjna413383/Gene/Summary?g=CRM22_004125;r=scaff_1692:321797-331173),[CRM22_008327](https://parasite.wormbase.org/Opisthorchis_felineus_prjna413383/Gene/Summary?g=CRM22_008327;r=scaff_393:19656-22363),[CRM22_004123](https://parasite.wormbase.org/Opisthorchis_felineus_prjna413383/Gene/Summary?g=CRM22_004123;r=scaff_1692:280540-288356),[CRM22_004122](https://parasite.wormbase.org/Opisthorchis_felineus_prjna413383/Gene/Summary?g=CRM22_004122;r=scaff_1692:254320-266857),[CRM22_004561](https://parasite.wormbase.org/Opisthorchis_felineus_prjna413383/Gene/Summary?g=CRM22_004561;r=scaff_1732:512707-529230) |
| [*C. viverrini*](https://parasite.wormbase.org/Opisthorchis_viverrini_prjna222628) | 10 | [T265_09387](https://parasite.wormbase.org/Opisthorchis_viverrini_prjna222628/Gene/Summary?g=T265_09387;r=opera_v5_272:362109-364112),[T265_14350](https://parasite.wormbase.org/Opisthorchis_viverrini_prjna222628/Gene/Summary?g=T265_14350;r=opera_v5_180:330181-332160),[T265_01626](https://parasite.wormbase.org/Opisthorchis_viverrini_prjna222628/Gene/Summary?g=T265_01626;r=opera_v5_18:189912-191944),[T265_08952](https://parasite.wormbase.org/Opisthorchis_viverrini_prjna222628/Gene/Summary?g=T265_08952;r=opera_v5_248:593655-600266),[T265_10849](https://parasite.wormbase.org/Opisthorchis_viverrini_prjna222628/Gene/Summary?g=T265_10849;r=scaffold181:345584-364081),[T265_09569](https://parasite.wormbase.org/Opisthorchis_viverrini_prjna222628/Gene/Summary?g=T265_09569;r=opera_v5_290:567270-578221),[T265_14351](https://parasite.wormbase.org/Opisthorchis_viverrini_prjna222628/Gene/Summary?g=T265_14351;r=opera_v5_180:350326-357507),[T265_14349](https://parasite.wormbase.org/Opisthorchis_viverrini_prjna222628/Gene/Summary?g=T265_14349;r=opera_v5_180:308566-310302),[T265_07677](https://parasite.wormbase.org/Opisthorchis_viverrini_prjna222628/Gene/Summary?g=T265_07677;r=opera_v5_180:286514-286825),[T265_09090](https://parasite.wormbase.org/Opisthorchis_viverrini_prjna222628/Gene/Summary?g=T265_09090;r=opera_v5_255:502941-537210) |
| Fasciolidae | *Fasciolopsis* | *F. buski* | 4 | [FBUS_04649](https://parasite.wormbase.org/Fasciolopsis_buski_prjna284521/Gene/Summary?g=FBUS_04649;r=F_buski-1.0_Cont771:904-7052),[FBUS_10566](https://parasite.wormbase.org/Fasciolopsis_buski_prjna284521/Gene/Summary?g=FBUS_10566;r=F_buski-1.0_Cont10147:3760-12395),[FBUS_01297](https://parasite.wormbase.org/Fasciolopsis_buski_prjna284521/Gene/Summary?g=FBUS_01297;r=F_buski-1.0_Cont413:418843-428769),[FBUS_02276](https://parasite.wormbase.org/Fasciolopsis_buski_prjna284521/Gene/Summary?g=FBUS_02276;r=F_buski-1.0_Cont3141:303868-304630) |
| *Fasciola* | *F. gigantica* | 5 | [FGIG_05938](https://parasite.wormbase.org/Fasciola_gigantica_prjna230515/Gene/Summary?g=FGIG_05938;r=F_gigantica-1.0_Cont2362:181933-182975),[FGIG_09827](https://parasite.wormbase.org/Fasciola_gigantica_prjna230515/Gene/Summary?g=FGIG_09827;r=F_gigantica-1.0_Cont3126:49589-53787),[FGIG_09828](https://parasite.wormbase.org/Fasciola_gigantica_prjna230515/Gene/Summary?g=FGIG_09828;r=F_gigantica-1.0_Cont3126:63641-79746),[FGIG_06505](https://parasite.wormbase.org/Fasciola_gigantica_prjna230515/Gene/Summary?g=FGIG_06505;r=F_gigantica-1.0_Cont1687:111736-126472),[FGIG_07913](https://parasite.wormbase.org/Fasciola_gigantica_prjna230515/Gene/Summary?g=FGIG_07913;r=F_gigantica-1.0_Cont5593:24608-25649) |
| *F. hepatica* | 7 | [FhHiC23_g7878](https://parasite.wormbase.org/Fasciola_hepatica_prjeb58756/Gene/Summary?g=FhHiC23_g7878;r=FhHiC23_scaffold_3:91477979-91498790),[FhHiC23_g13326](https://parasite.wormbase.org/Fasciola_hepatica_prjeb58756/Gene/Summary?g=FhHiC23_g13326;r=FhHiC23_scaffold_6:84541456-84555732),[FhHiC23_g5882](https://parasite.wormbase.org/Fasciola_hepatica_prjeb58756/Gene/Summary?g=FhHiC23_g5882;r=FhHiC23_scaffold_2:107869909-107889758),[FhHiC23_g12854](https://parasite.wormbase.org/Fasciola_hepatica_prjeb58756/Gene/Summary?g=FhHiC23_g12854;r=FhHiC23_scaffold_6:51253133-51269643);[D915_009739](https://parasite.wormbase.org/Fasciola_hepatica_prjna179522/Gene/Summary?g=D915_009739;r=F_hepatica-1.0_Cont6053:18101-25484),[D915_003308](https://parasite.wormbase.org/Fasciola_hepatica_prjna179522/Gene/Summary?g=D915_003308;r=F_hepatica-1.0_Cont921:1002-16324),[D915_005664](https://parasite.wormbase.org/Fasciola_hepatica_prjna179522/Gene/Summary?g=D915_005664;r=F_hepatica-1.0_Cont2345:119371-130630) |
| Paragonimidae | *Paragonimus* | *P. westermani* | 11 | [P879_11570](https://parasite.wormbase.org/Paragonimus_westermani_prjna219632/Gene/Summary?g=P879_11570;r=P_westermani-1.0_Cont21219:1497-11560),[P879_09597](https://parasite.wormbase.org/Paragonimus_westermani_prjna219632/Gene/Summary?g=P879_09597;r=P_westermani-1.0_Cont17988:20959-30690),[P879_10786](https://parasite.wormbase.org/Paragonimus_westermani_prjna219632/Gene/Summary?g=P879_10786;r=P_westermani-1.0_Cont6783:3447-13862),[P879_01084](https://parasite.wormbase.org/Paragonimus_westermani_prjna219632/Gene/Summary?g=P879_01084;r=P_westermani-1.0_Cont2402:12100-21913),[P879_11113](https://parasite.wormbase.org/Paragonimus_westermani_prjna219632/Gene/Summary?g=P879_11113;r=P_westermani-1.0_Cont19138:5942-10899);[DEA37_0013636](https://parasite.wormbase.org/Paragonimus_westermani_prjna454344/Gene/Summary?g=DEA37_0013636;r=PW_00004543:41711-51242),[DEA37_0001254](https://parasite.wormbase.org/Paragonimus_westermani_prjna454344/Gene/Summary?g=DEA37_0001254;r=PW_00000230:226319-239043),[DEA37_0001256](https://parasite.wormbase.org/Paragonimus_westermani_prjna454344/Gene/Summary?g=DEA37_0001256;r=PW_00000230:193254-211468),[DEA37_0004613](https://parasite.wormbase.org/Paragonimus_westermani_prjna454344/Gene/Summary?g=DEA37_0004613;r=PW_00000471:73675-81352),[DEA37_0012472](https://parasite.wormbase.org/Paragonimus_westermani_prjna454344/Gene/Summary?g=DEA37_0012472;r=PW_00009584:4737-5283),[DEA37_0003065](https://parasite.wormbase.org/Paragonimus_westermani_prjna454344/Gene/Summary?g=DEA37_0003065;r=PW_00009687:11542-11715) |
| Echinostomatidae | *Echinostoma* | [*E. caproni*](https://parasite.wormbase.org/Echinostoma_caproni_prjeb1207) | 4 | [ECPE_0000177401](https://parasite.wormbase.org/Echinostoma_caproni_prjeb1207/Gene/Summary?g=ECPE_0000177401;r=ECPE_contig0015043:20-1034),[ECPE_0001442401](https://parasite.wormbase.org/Echinostoma_caproni_prjeb1207/Gene/Summary?g=ECPE_0001442401;r=ECPE_scaffold0018065:4941-6882),[ECPE_0001729601](https://parasite.wormbase.org/Echinostoma_caproni_prjeb1207/Gene/Summary?g=ECPE_0001729601;r=ECPE_scaffold0028891:3675-4337),[ECPE_0001431601](https://parasite.wormbase.org/Echinostoma_caproni_prjeb1207/Gene/Summary?g=ECPE_0001431601;r=ECPE_scaffold0017788:10320-11445) |
|  | Microphallidae | *Atriophallophorus* | [*A. winterbourni*](https://parasite.wormbase.org/Atriophallophorus_winterbourni_prjna636673) | 4 | [maker-jcf7180000223667-snap-gene-0.22](https://parasite.wormbase.org/Atriophallophorus_winterbourni_prjna636673/Gene/Summary?g=maker-jcf7180000223667-snap-gene-0.22;r=jcf7180000223667:91167-93673),[maker-agouti_scaf_1359-augustus-gene-0.8](https://parasite.wormbase.org/Atriophallophorus_winterbourni_prjna636673/Gene/Summary?g=maker-agouti_scaf_1359-augustus-gene-0.8;r=agouti_scaf_1359:99421-101685),[maker-jcf7180000226790-snap-gene-0.1](https://parasite.wormbase.org/Atriophallophorus_winterbourni_prjna636673/Gene/Summary?g=maker-jcf7180000226790-snap-gene-0.1;r=jcf7180000226790:9035-25563),[maker-jcf7180000277603-augustus-gene-0.9](https://parasite.wormbase.org/Atriophallophorus_winterbourni_prjna636673/Gene/Summary?g=maker-jcf7180000277603-augustus-gene-0.9;r=jcf7180000277603:2573-7294) |
| Dicrocoeliidae | *Dicrocoelium* | [*D. dendriticum*](https://parasite.wormbase.org/Dicrocoelium_dendriticum_prjeb44434) | 3 | [DDND1_95490](https://parasite.wormbase.org/Dicrocoelium_dendriticum_prjeb44434/Gene/Summary?g=DDND1_95490;r=LKG_10:4610421-4648752),[DDND1_3240](https://parasite.wormbase.org/Dicrocoelium_dendriticum_prjeb44434/Gene/Summary?g=DDND1_3240;r=LKG_1:46463546-46504250),[DDND1_3760](https://parasite.wormbase.org/Dicrocoelium_dendriticum_prjeb44434/Gene/Summary?g=DDND1_3760;r=LKG_1:54841044-54857509) |
| Gyrodactylidae | *Gyrodactylu*s | [*G. salaris*](https://parasite.wormbase.org/Gyrodactylus_salaris_prjna244375) | 6 | [snap_masked-scf7180006948262-processed-gene-0.18](https://parasite.wormbase.org/Gyrodactylus_salaris_prjna244375/Gene/Summary?g=snap_masked-scf7180006948262-processed-gene-0.18;r=scf7180006948262:398-890),[augustus_masked-scf7180006946807-processed-gene-0.4](https://parasite.wormbase.org/Gyrodactylus_salaris_prjna244375/Gene/Summary?g=augustus_masked-scf7180006946807-processed-gene-0.4;r=scf7180006946807:10239-10874),[augustus_masked-scf7180006950007-processed-gene-0.4](https://parasite.wormbase.org/Gyrodactylus_salaris_prjna244375/Gene/Summary?g=augustus_masked-scf7180006950007-processed-gene-0.4;r=scf7180006950007:43752-44213),[snap_masked-scf7180006953386-processed-gene-0.29](https://parasite.wormbase.org/Gyrodactylus_salaris_prjna244375/Gene/Summary?g=snap_masked-scf7180006953386-processed-gene-0.29;r=scf7180006953386:28802-29449),[snap_masked-scf7180006953084-processed-gene-0.17](https://parasite.wormbase.org/Gyrodactylus_salaris_prjna244375/Gene/Summary?g=snap_masked-scf7180006953084-processed-gene-0.17;r=scf7180006953084:7325-9287),[maker-scf7180006951467-augustus-gene-0.11](https://parasite.wormbase.org/Gyrodactylus_salaris_prjna244375/Gene/Summary?g=maker-scf7180006951467-augustus-gene-0.11;r=scf7180006951467:3048-3653) |
| *G. bullatarudis* | 5 | [Gbulla1a004932](https://parasite.wormbase.org/Gyrodactylus_bullatarudis_prjna532341/Gene/Summary?g=Gbulla1a004932;r=scaffold_99_uid_1526368211:495668-496138),[Gbulla1a008207](https://parasite.wormbase.org/Gyrodactylus_bullatarudis_prjna532341/Gene/Summary?g=Gbulla1a008207;r=scaffold_151_uid_1526368211:108355-108999),[Gbulla1a001245](https://parasite.wormbase.org/Gyrodactylus_bullatarudis_prjna532341/Gene/Summary?g=Gbulla1a001245;r=scaffold_161_uid_1526368211:301862-307992),[Gbulla1a005261](https://parasite.wormbase.org/Gyrodactylus_bullatarudis_prjna532341/Gene/Summary?g=Gbulla1a005261;r=scaffold_51_uid_1526368211:121532-122223),[Gbulla1a004110](https://parasite.wormbase.org/Gyrodactylus_bullatarudis_prjna532341/Gene/Summary?g=Gbulla1a004110;r=scaffold_115_uid_1526368211:748511-749182) |


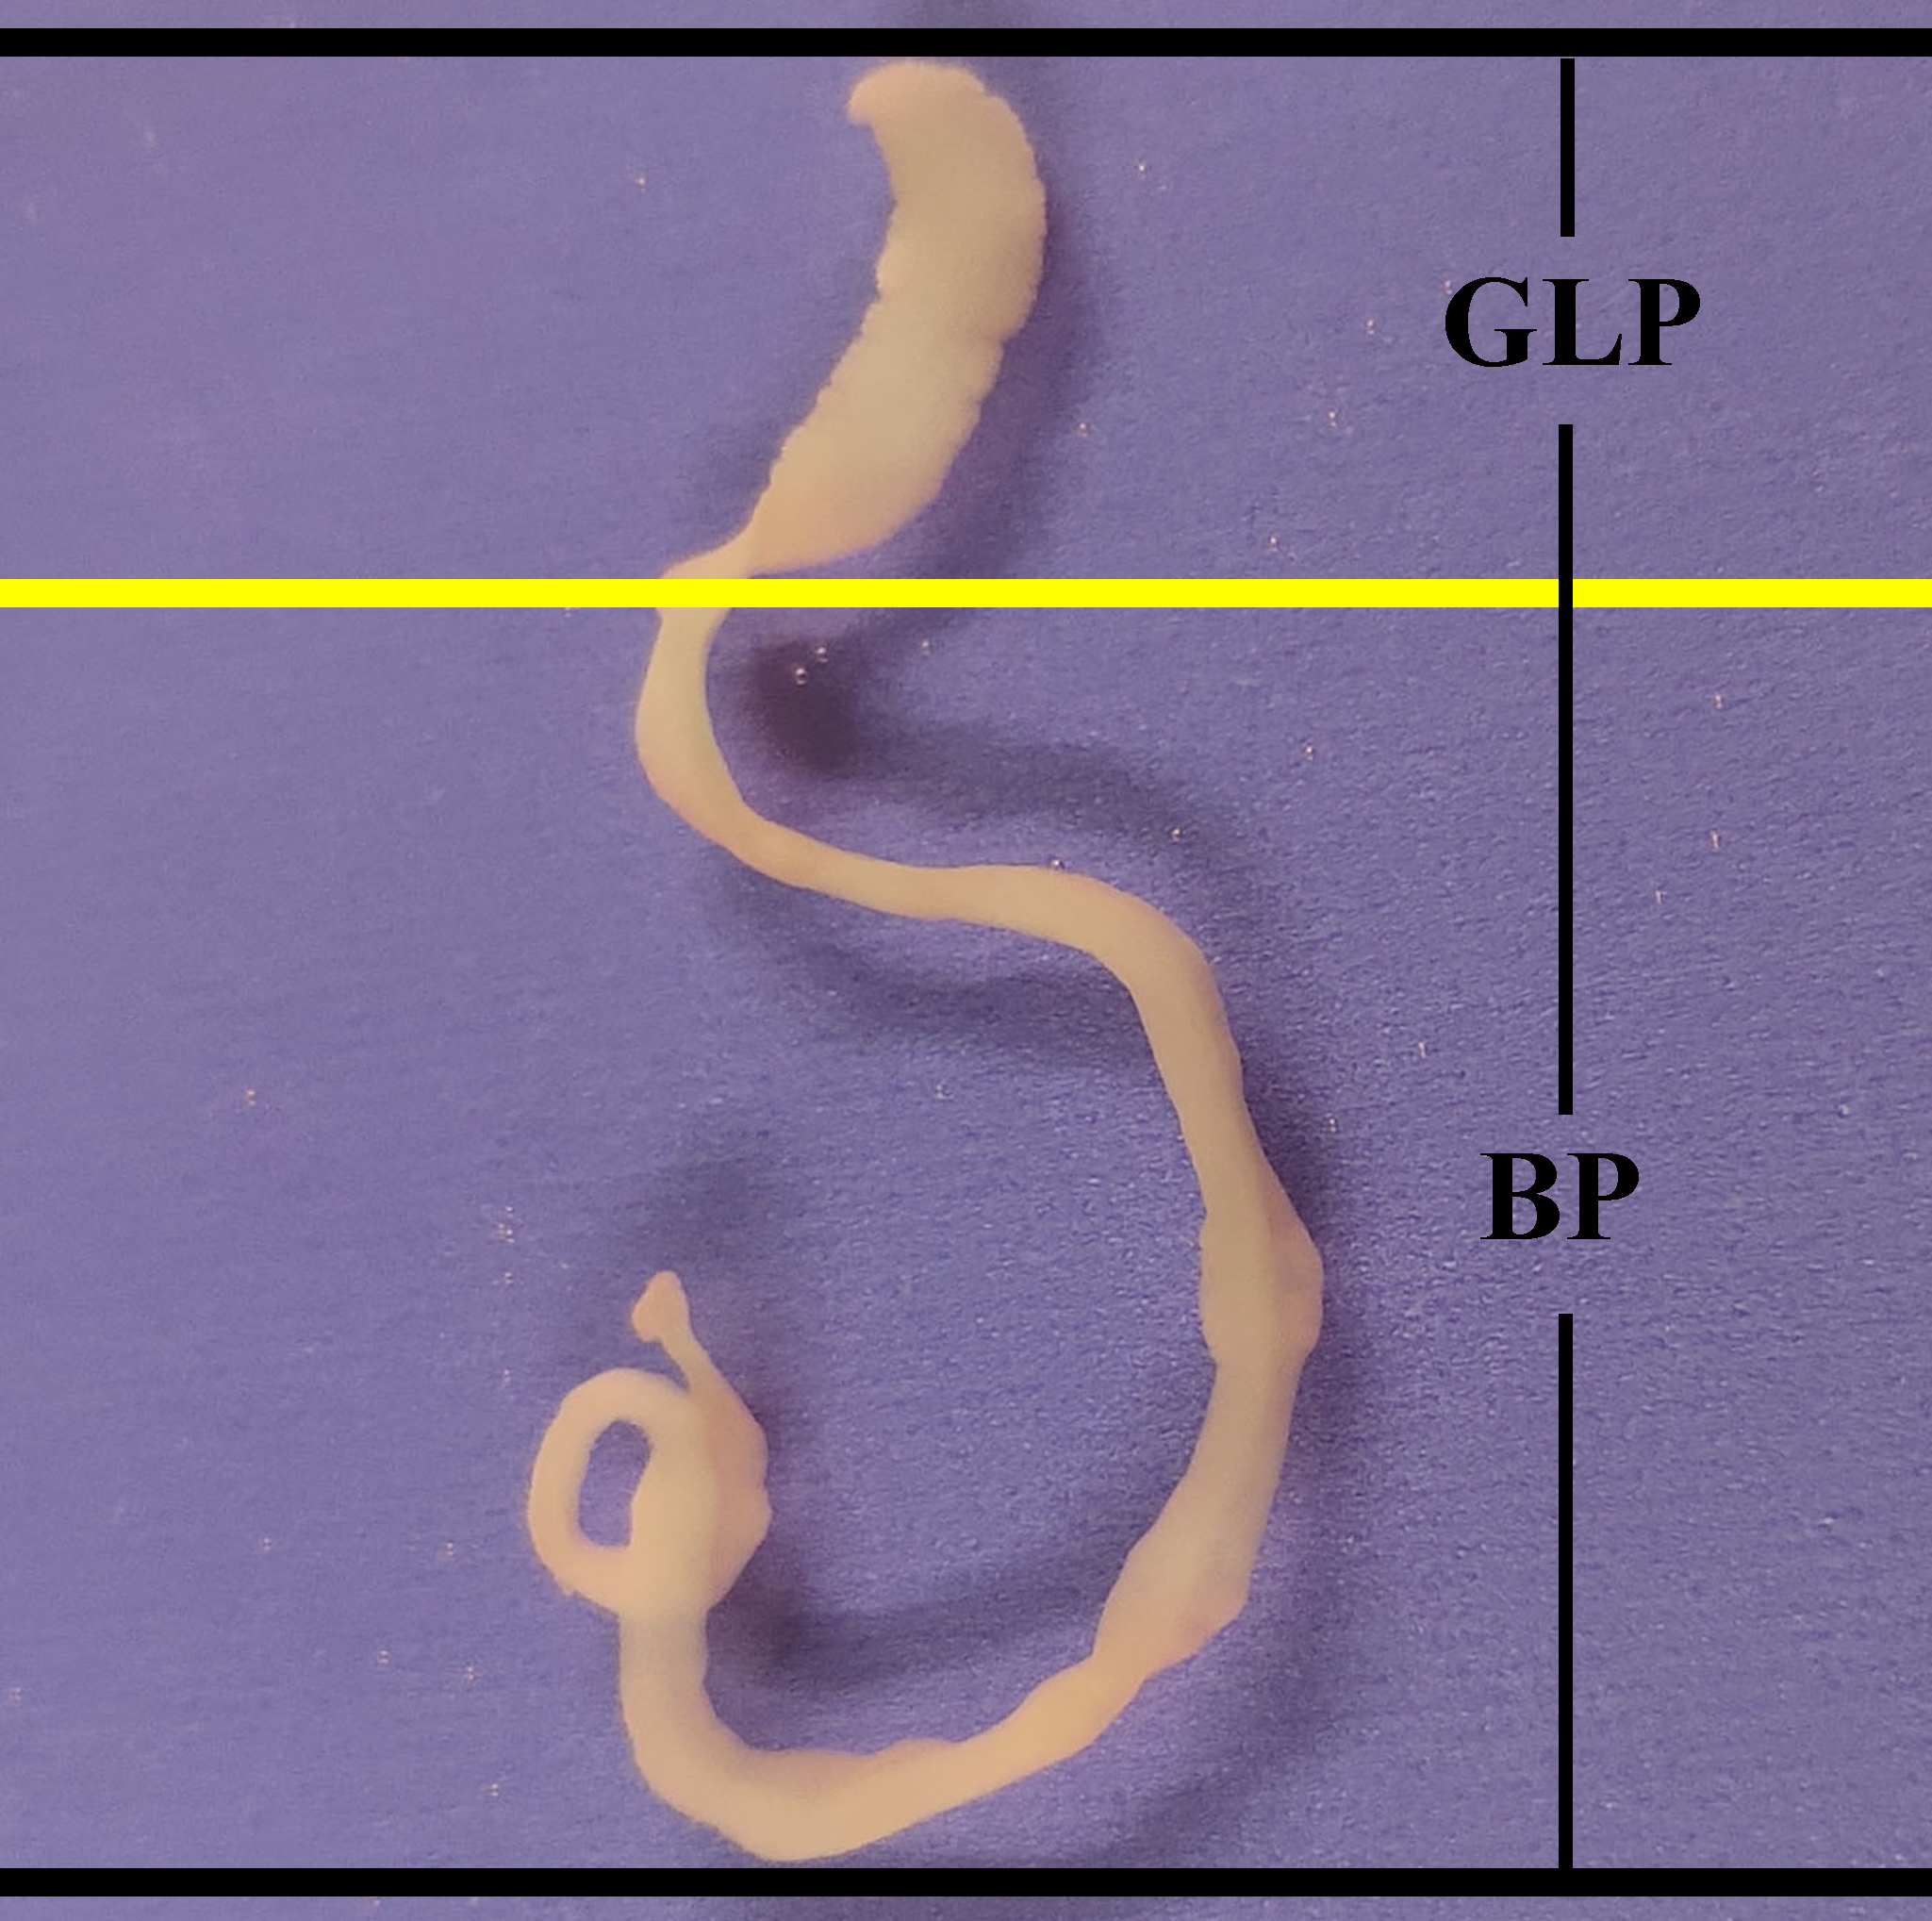


**Fig. S1** Diagrammatic sketch of GLP and BP of a plerocercoid..


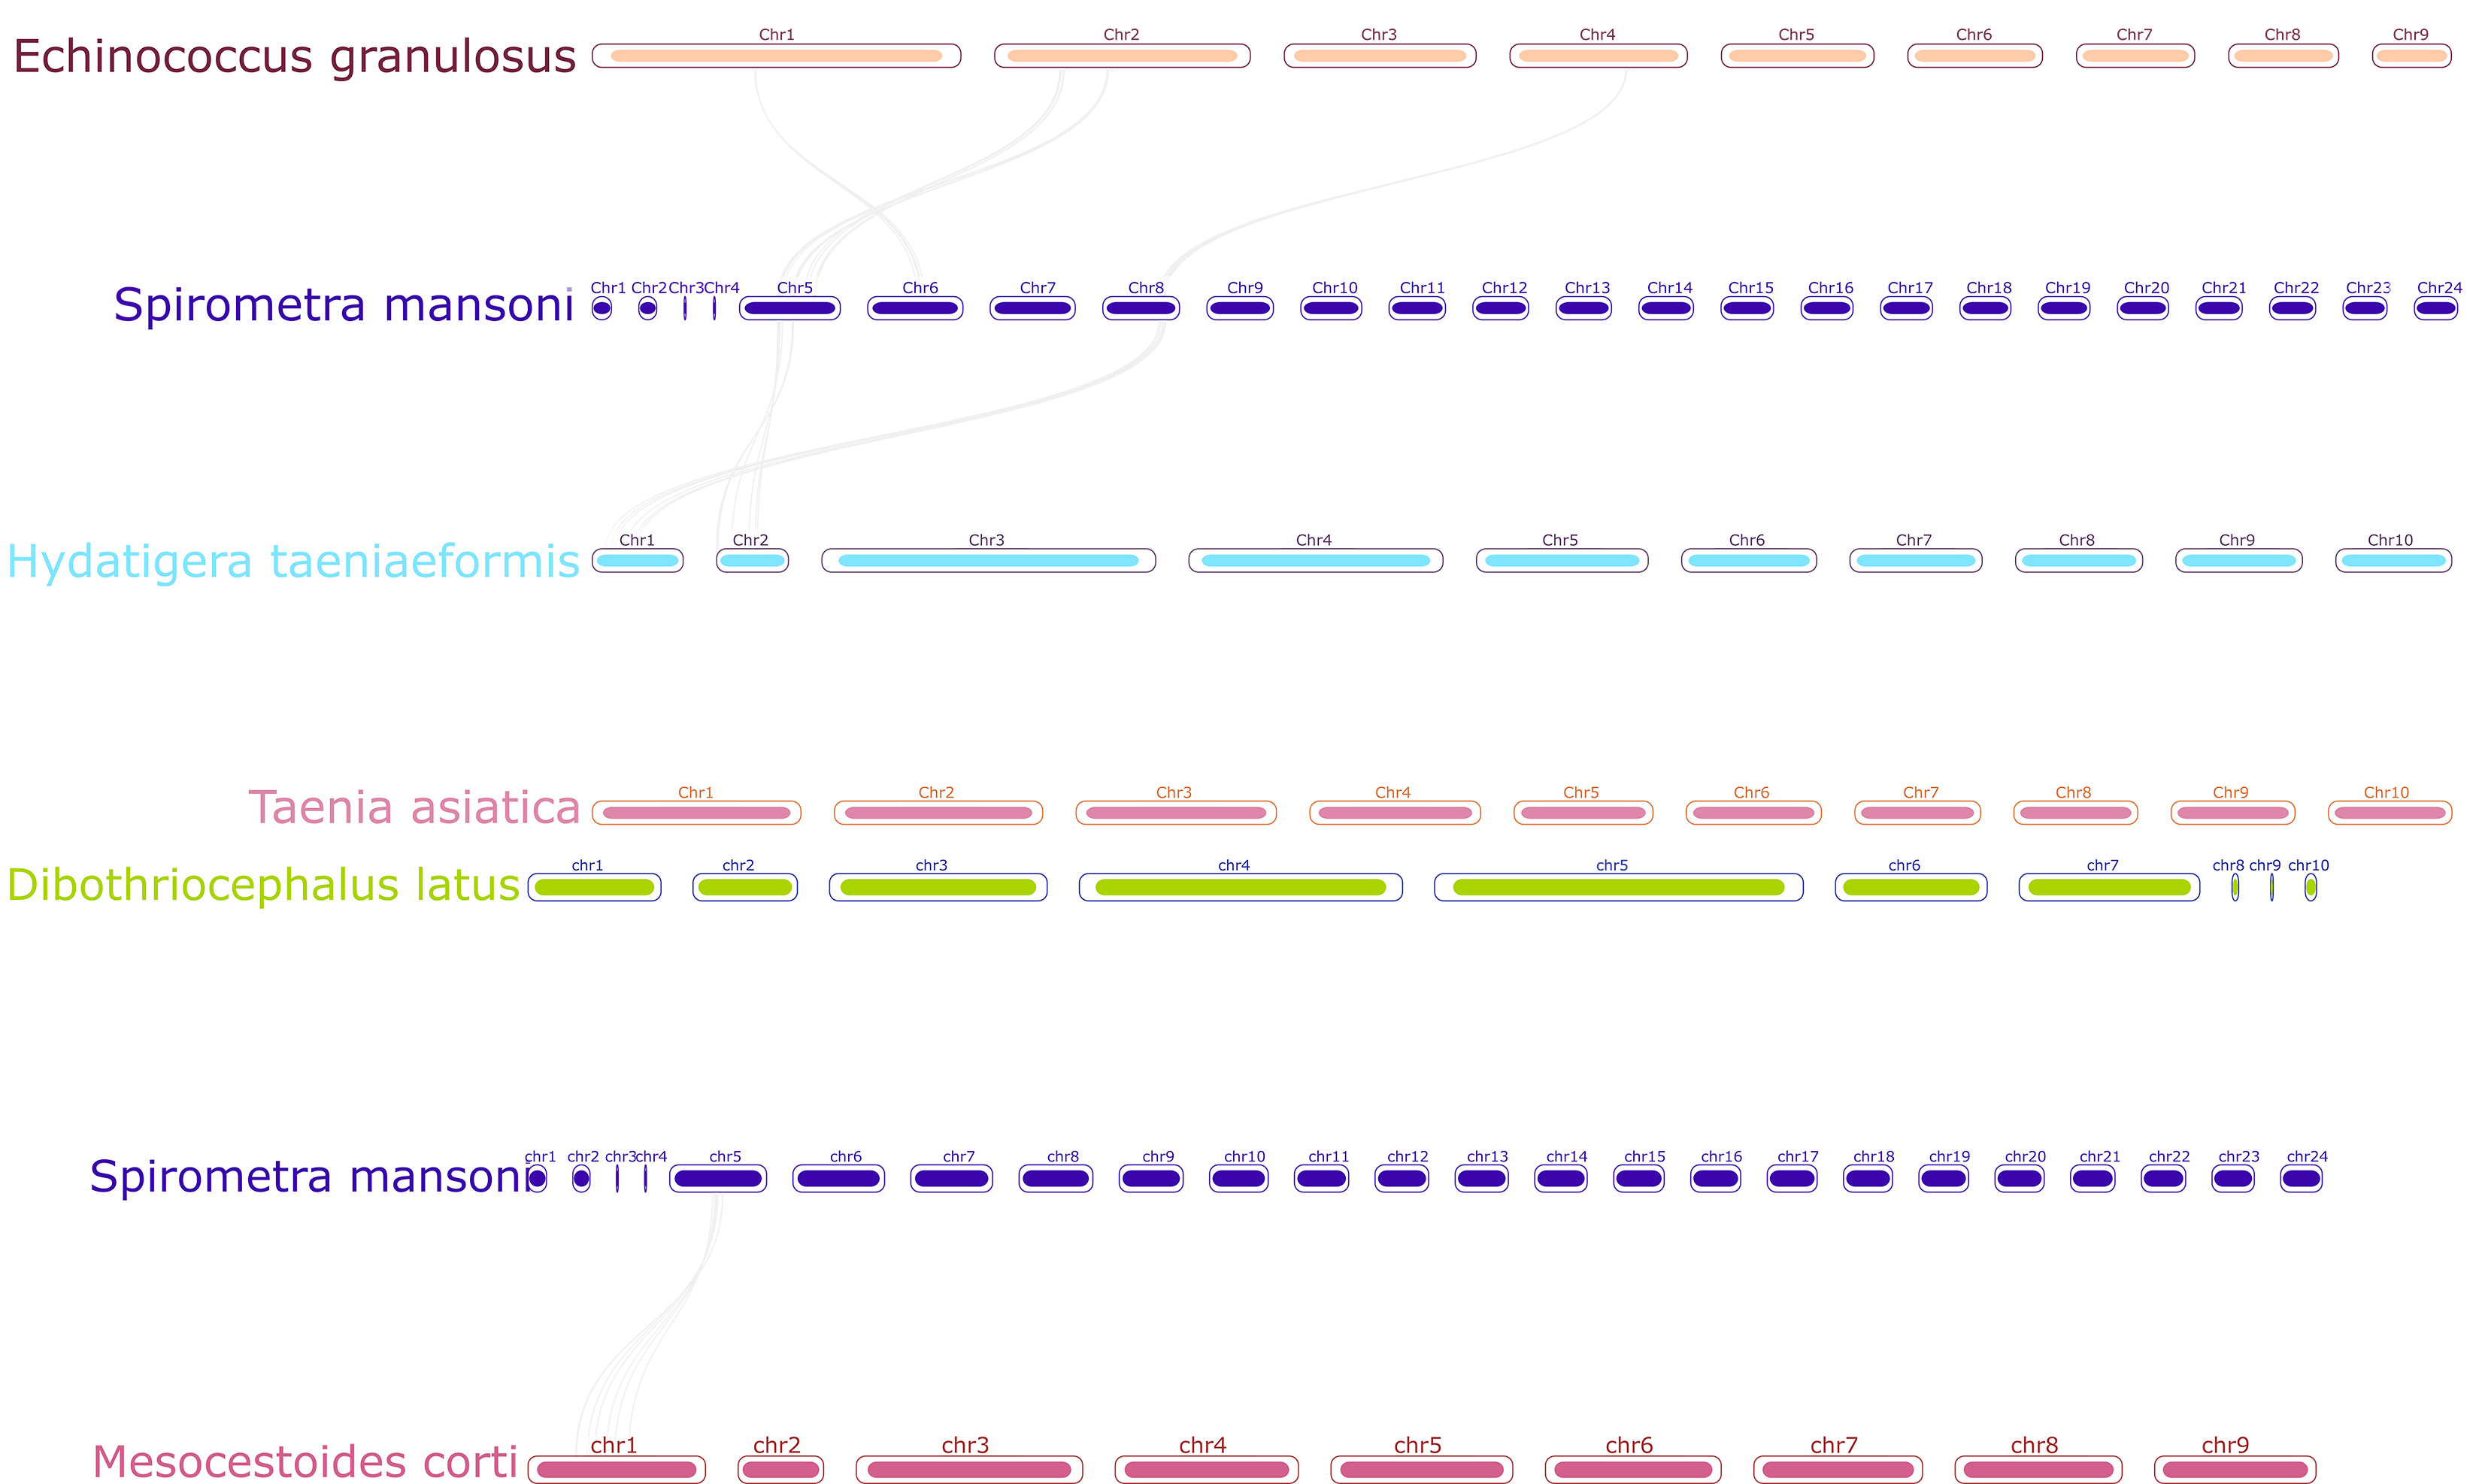


**Fig. S2** Analysis of chromosome positioning among species.

**
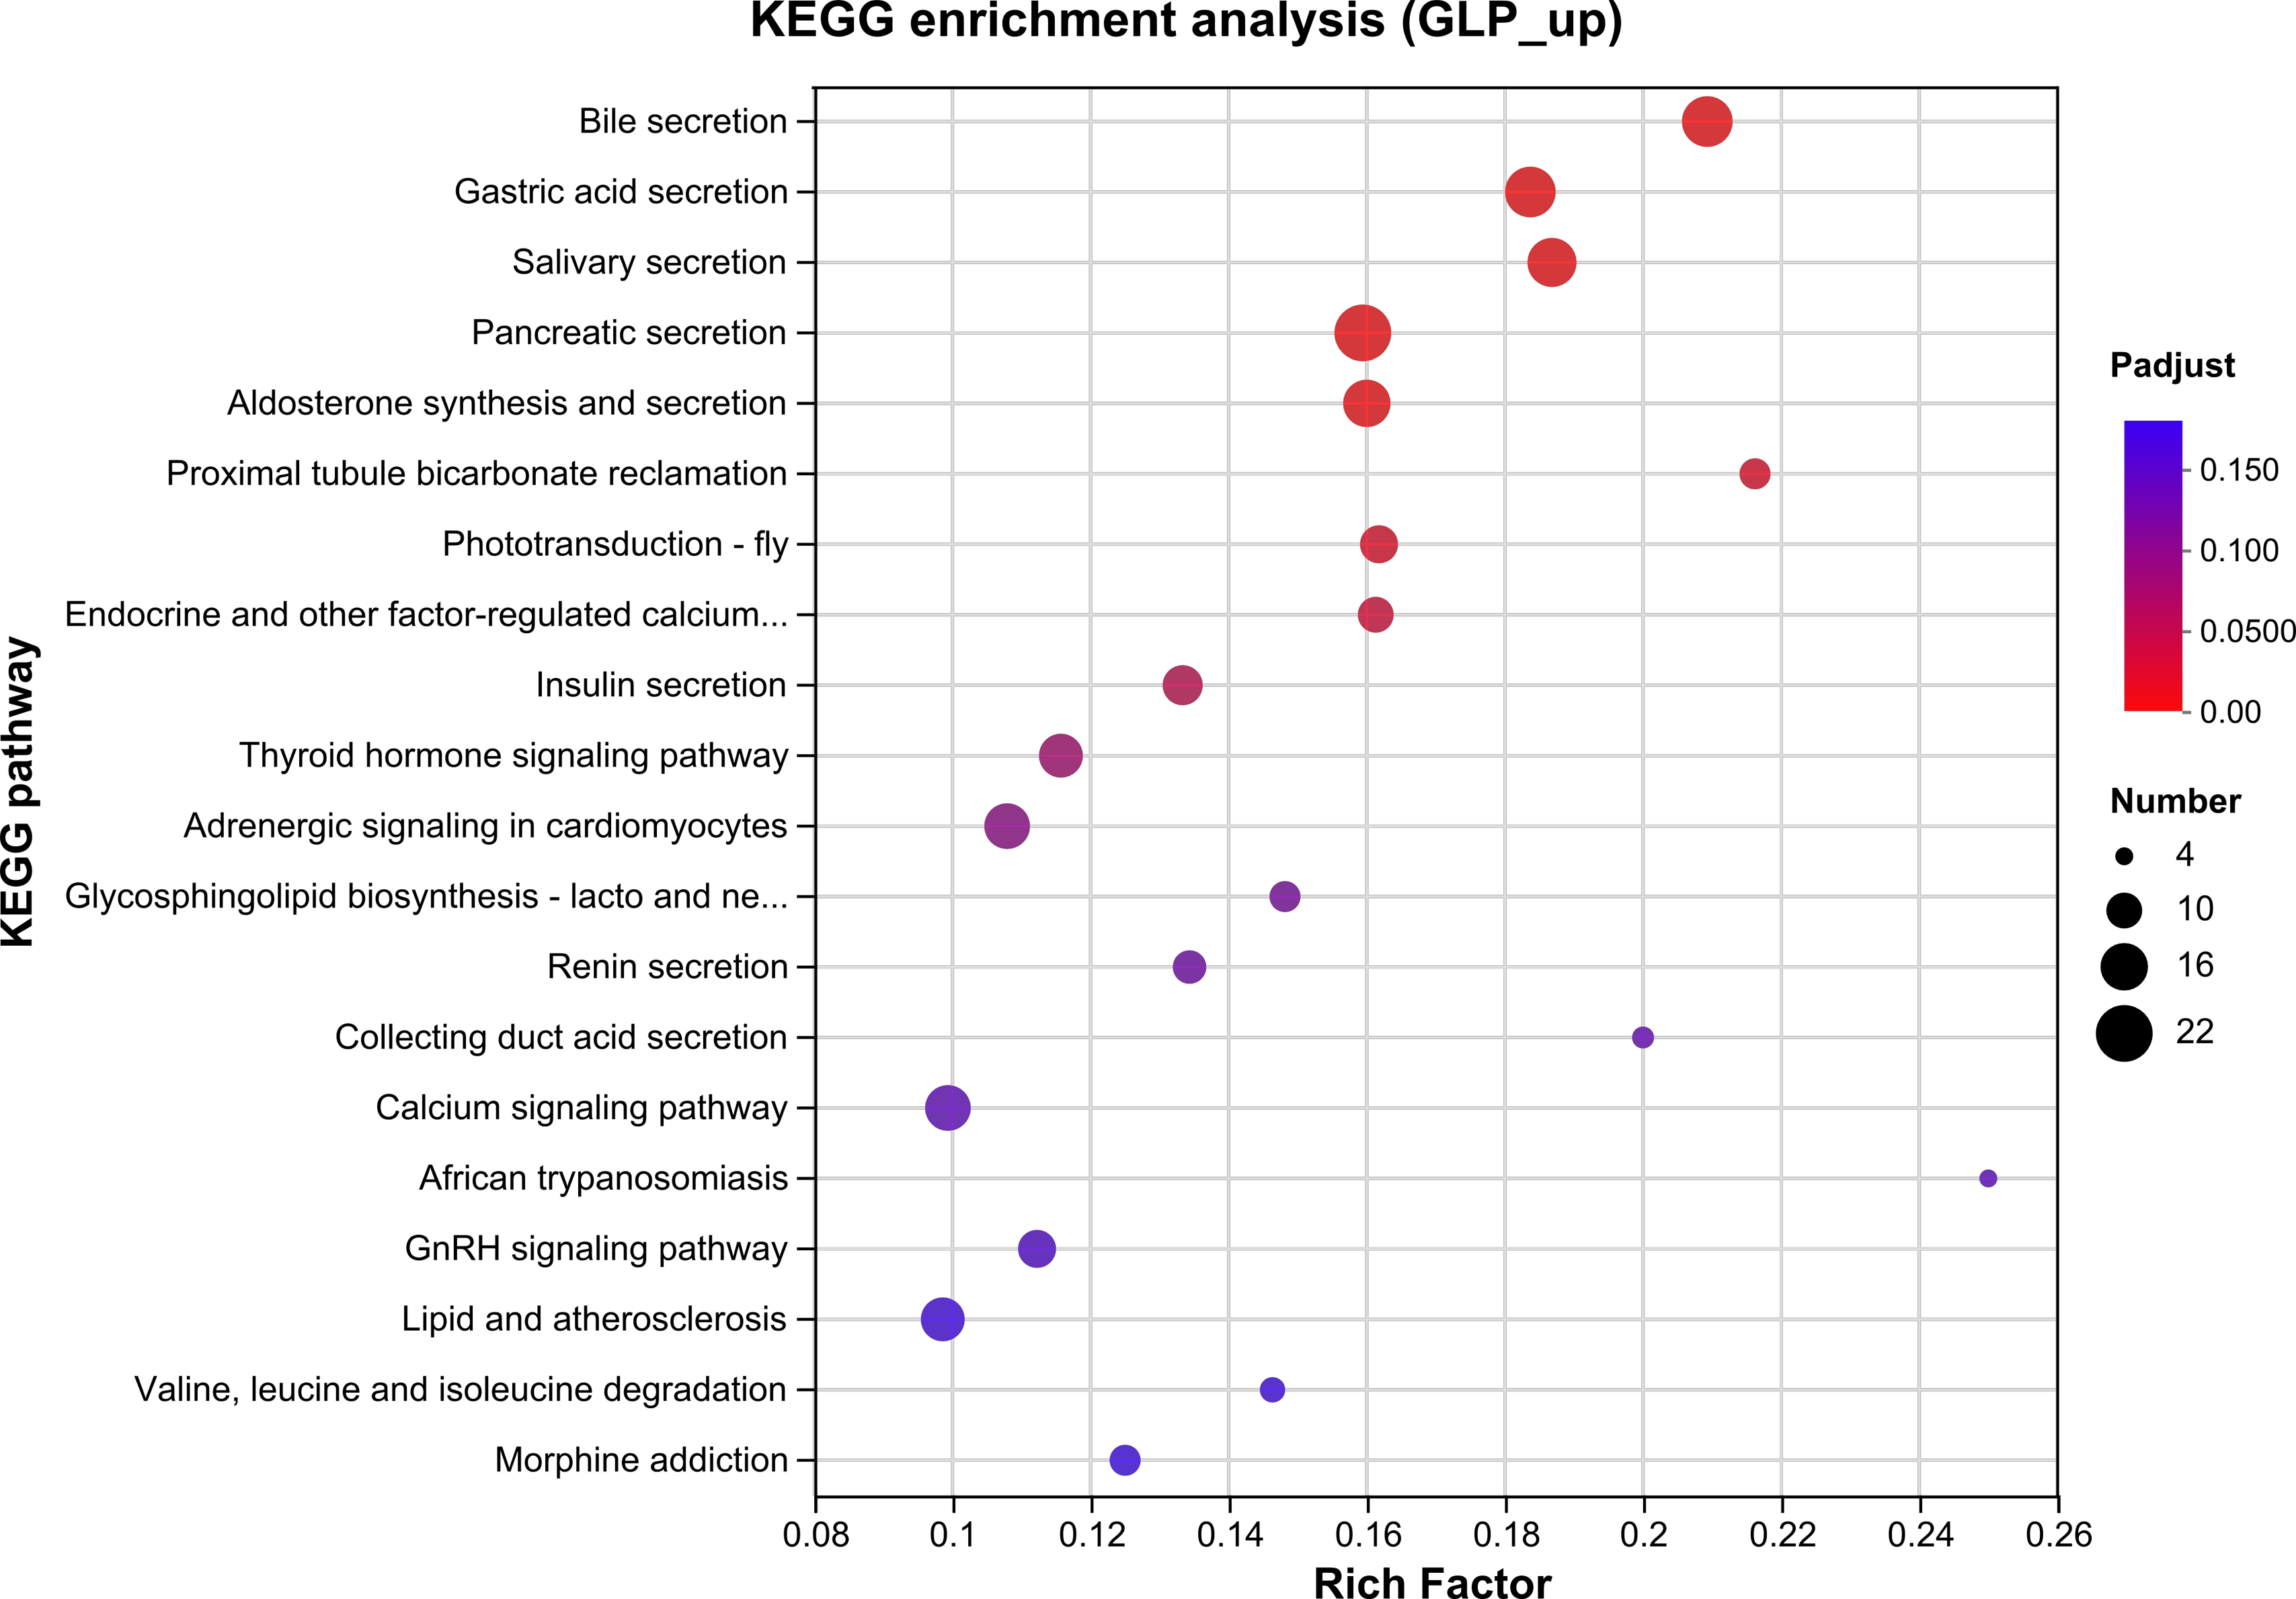
**

**Fig. S3** Enrichment analysis of the 20 most significant KEGG pathways of DEGs in the germinal layer tissue of pterygoids. Different colours indicate different degrees of enrichment.

**
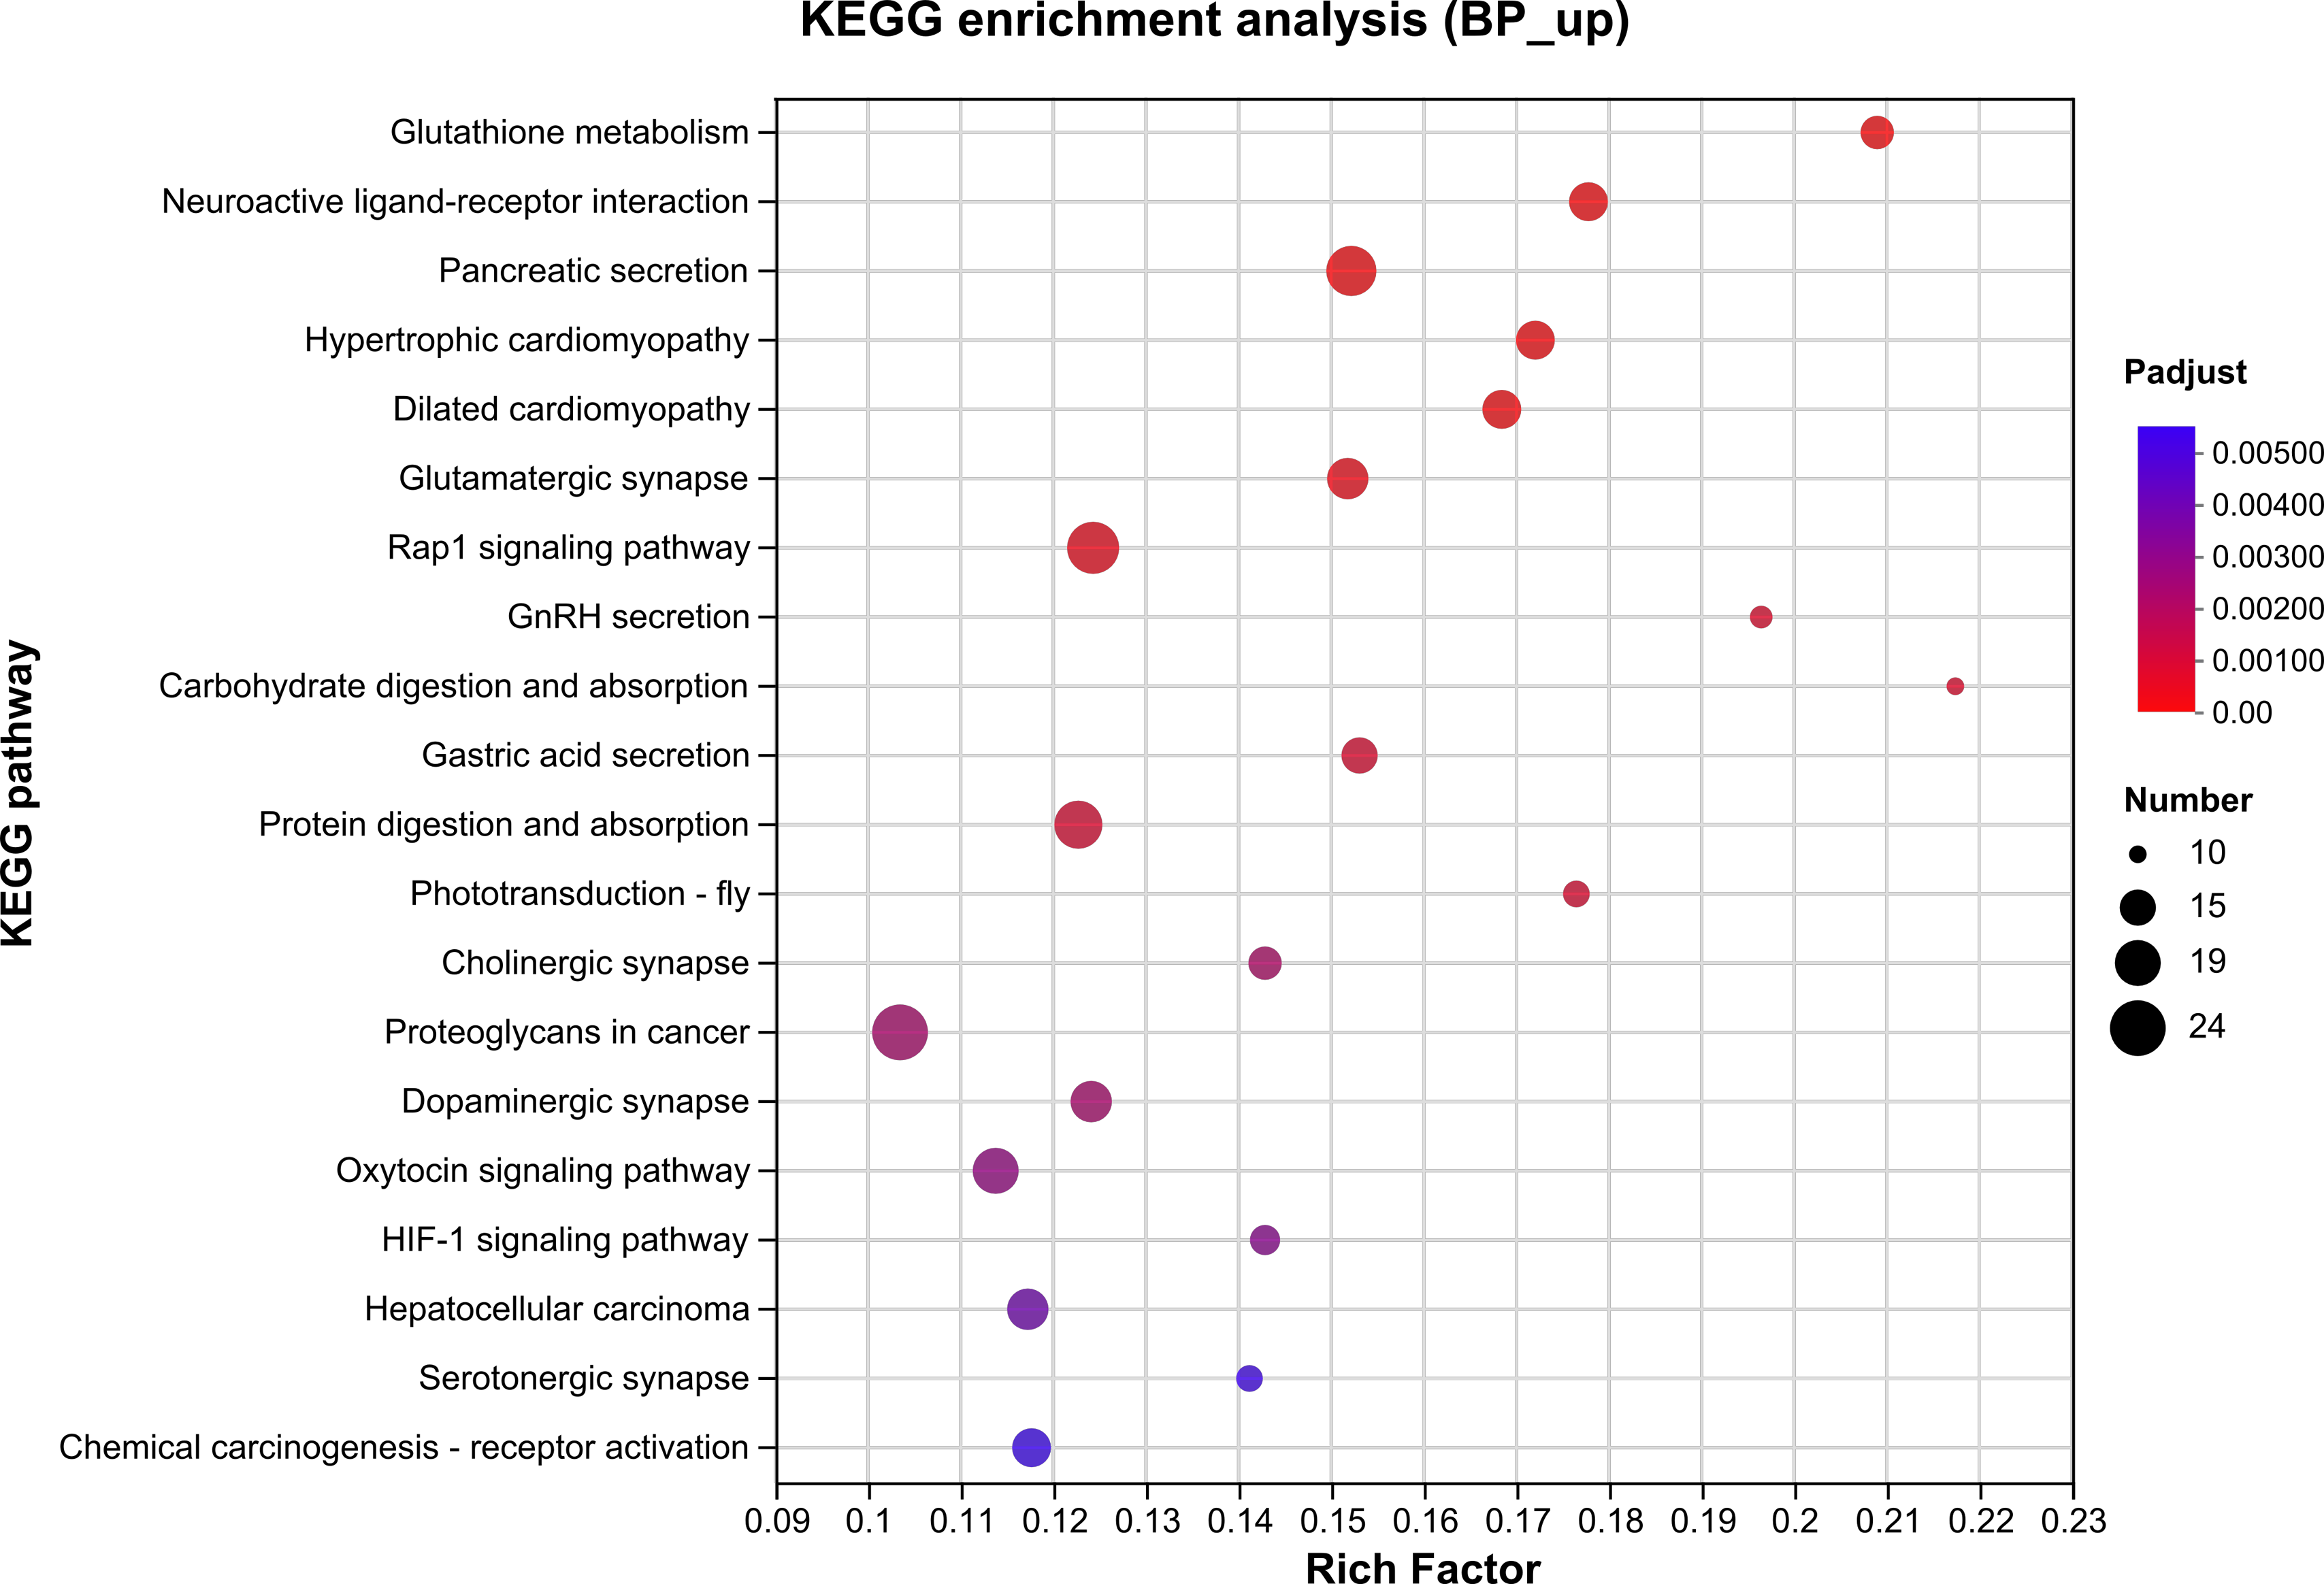
**

**Fig. S4** Enrichment analysis of the 20 most significant KEGG pathways of DEGs in the body parts of plerocercoids.

**
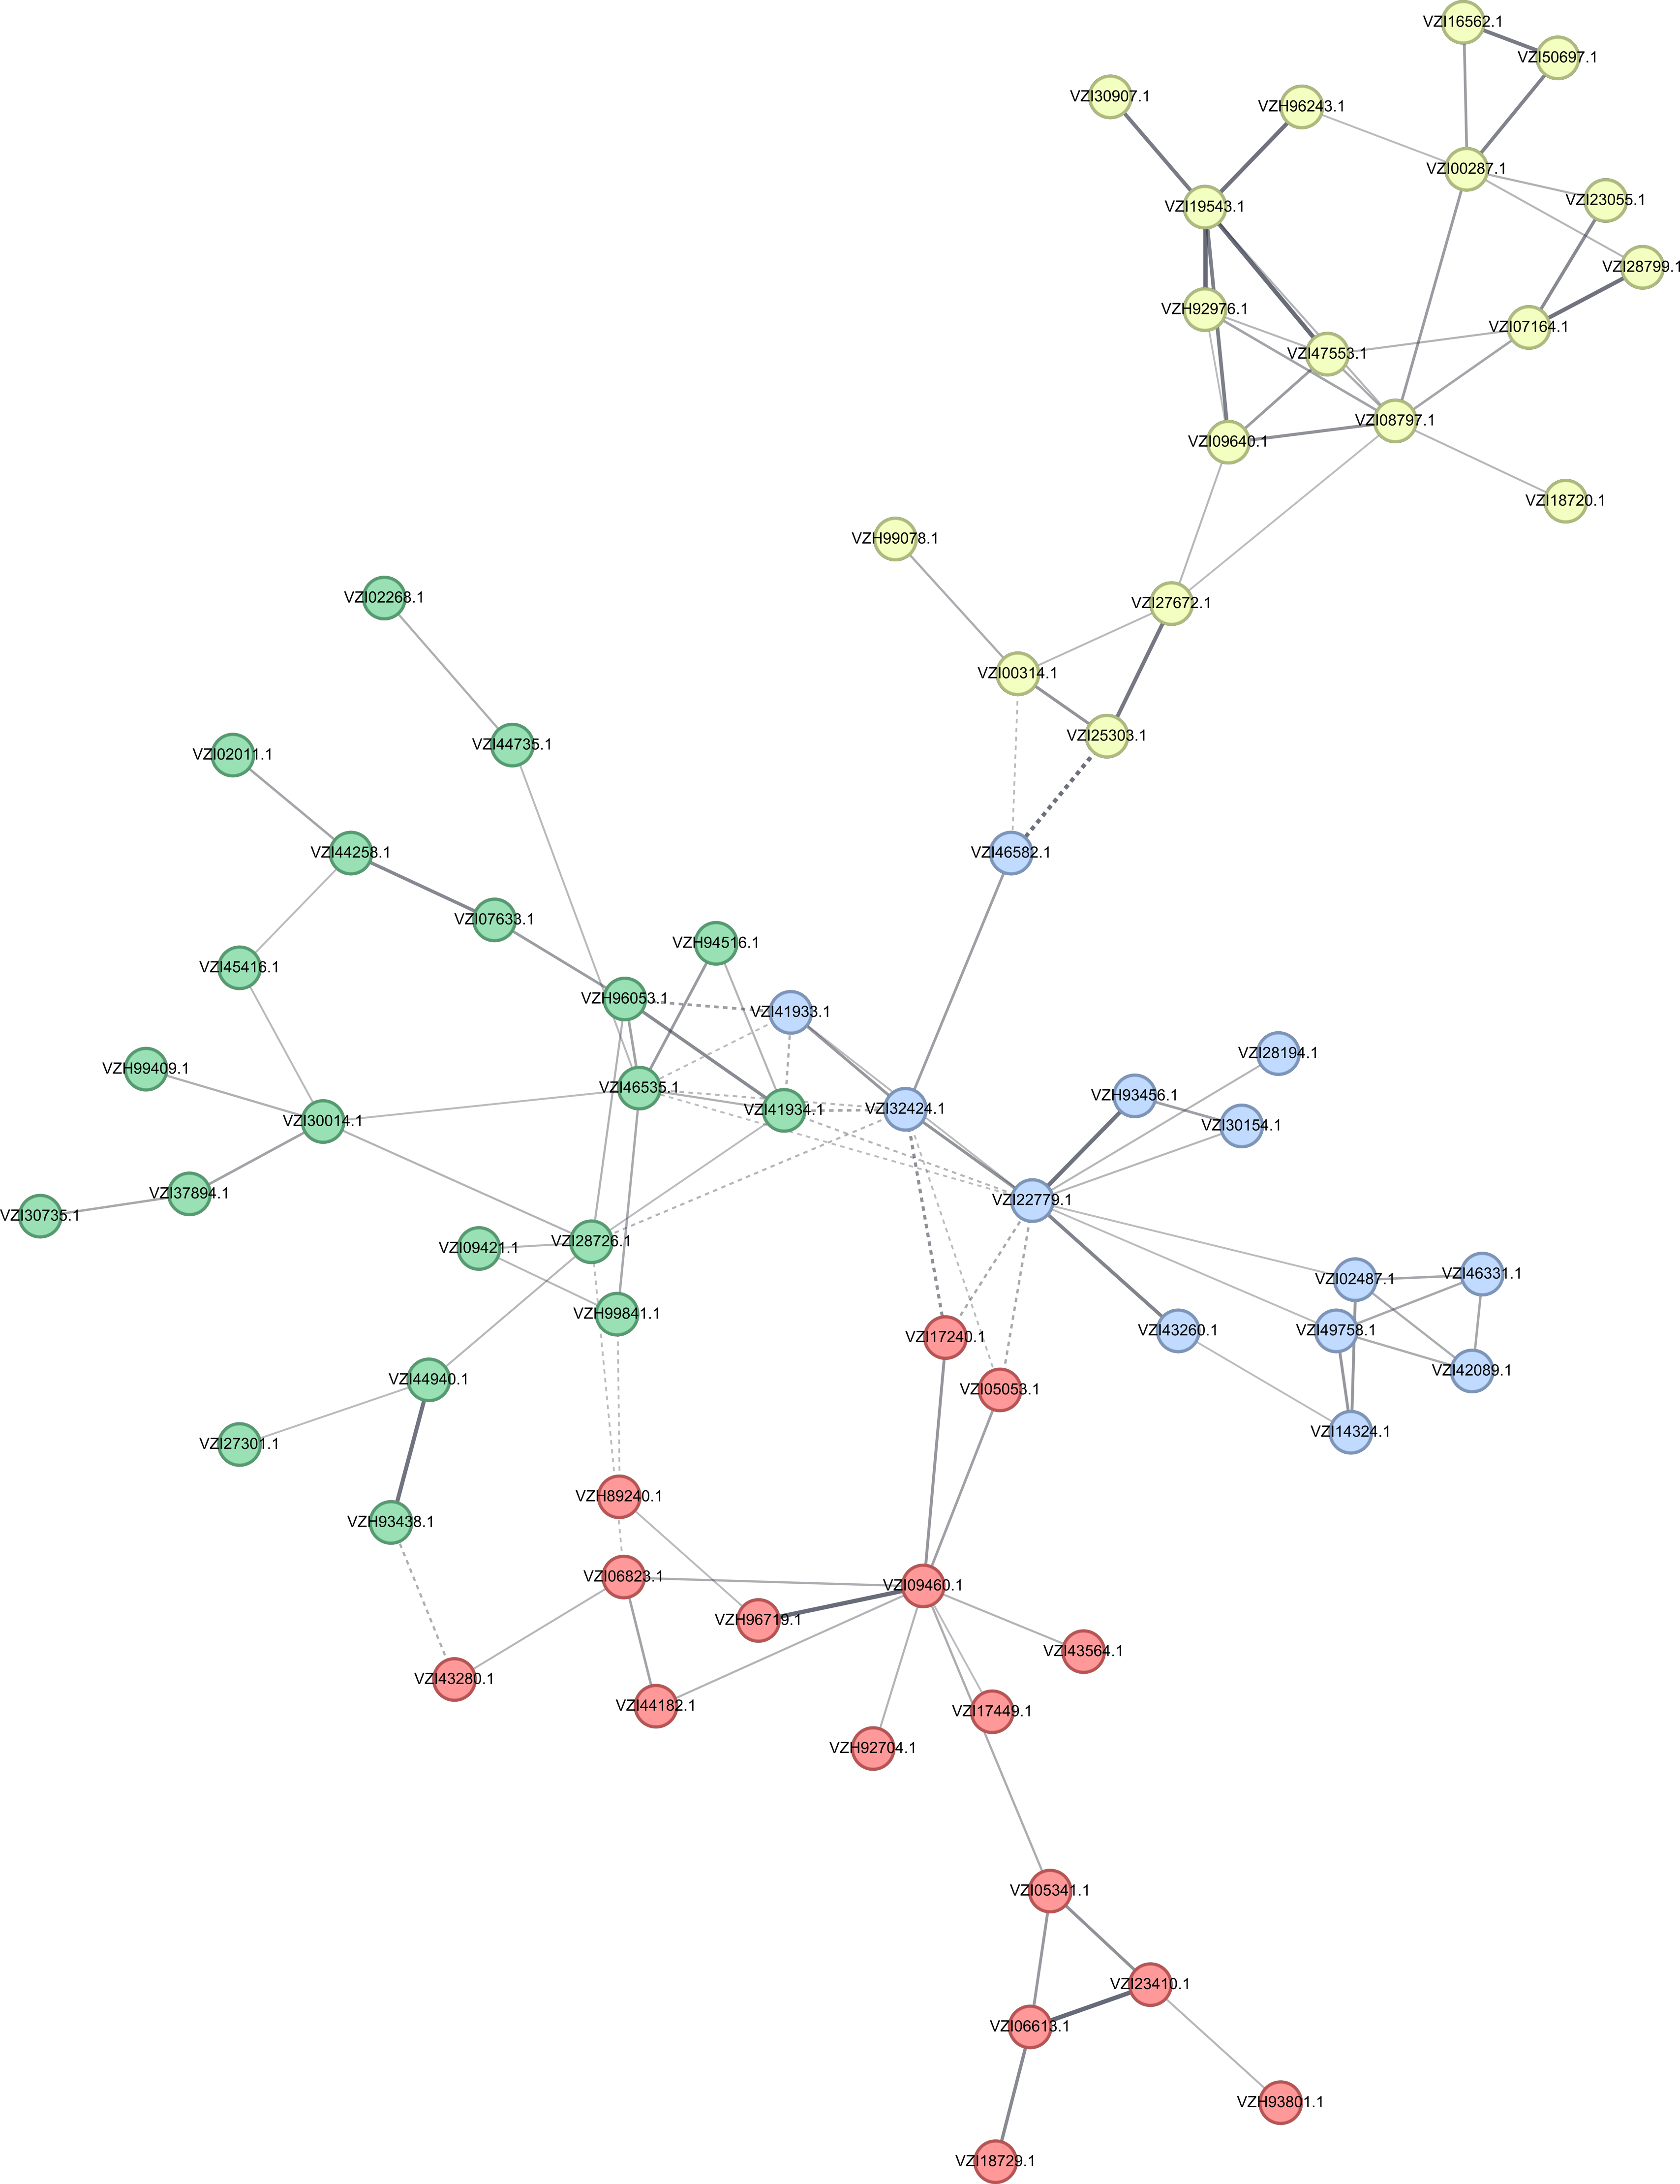
**

**Fig. S5** PPI analysis of differentially expressed genes. The dots represent differentially expressed genes.
